# Supplementary material for: A Journey through Diastereomeric Space: The Design, Synthesis, In Vitro and In Vivo Pharmacological Activity, and Molecular Modeling of Novel Potent Diastereomeric MOR Agonists and Antagonists
Source: MDPI journal article supplement (doi:10.3390/molecules27196455), 2022-09-30
Supplement: s1 [file s1]

## SUPPLEMENTARY MATERIALS

# A Journey Through Diastereomeric Space: The Design, Synthesis, In Vitro and In Vivo Pharmacological Activity, and Molecular Modeling of Novel Potent Diastereomeric MOR Agonists and Antagonists

Dana R. Chambers <sup>1</sup>, Agnieszka Sulima <sup>1</sup>, Dan Luo <sup>2</sup>, Thomas E. Prisinzano <sup>2</sup>, Alexander Goldberg <sup>3</sup>, Bing Xie <sup>3</sup>, Lei Shi <sup>3</sup>, Carol A. Paronis <sup>4</sup>, Jack Bergman <sup>4</sup>, Nima Nassehi <sup>5</sup>, Dana E. Selley <sup>5</sup>, Gregory H. Imler <sup>6</sup>, Arthur E. Jacobson <sup>1,\*</sup> and Kenner C. Rice <sup>1,\*</sup>

<sup>1</sup> Drug Design and Synthesis Section, Molecular Targets and Medications Discovery Branch, Intramural Research Program, National Institute on Drug Abuse and the National Institute on Alcohol Abuse and Alcoholism, National Institutes of Health, Department of Health and Human Services, 9800 Medical Center Drive, Bethesda, MD 20892, USA

<sup>2</sup> Department of Pharmaceutical Sciences, College of Pharmacy, University of Kentucky, 789 S. Limestone Street, Lexington, KY 40536, USA

<sup>3</sup> Computational Chemistry and Molecular Biophysics Section, Molecular Targets and Medications Discovery Branch, Intramural Research Program, National Institute on Drug Abuse, National Institutes of Health, Department of Health and Human Services, 333 Cassell Drive, Baltimore, MD 21224, USA

<sup>4</sup> McLean Hospital, Harvard Medical School, 115 Mill Street, Belmont MA 02478, USA;

<sup>5</sup> Department of Pharmacology and Toxicology, Virginia Commonwealth University, 1112 East Clay Street, Richmond, VA 23298, USA

<sup>6</sup> Naval Research Laboratory, Center for Biomolecular Science and Engineering, Washington, DC 20375, USA;

\* Correspondence: arthurj@nida.nih.gov (A.E.J.); kennerr@nida.nih.gov (K.C.R.); Tel.: +1-301-451-5028 (A.E.J.); +1-301-451-4799 (K.C.R.)

| <b>Table Sof Contents</b>                                                        | <b>Page #</b> |
|----------------------------------------------------------------------------------|---------------|
| 1) $^1\text{H}$ (top of page) & $^{13}\text{C}$ NMR (bottom of page)             | 3–18          |
| 2) Tables S1 – S7. Crystal data, atomic coordinates, etc, for compound <b>8</b>  | 19–27         |
| 3) Tables S1 – S7. Crystal data, atomic coordinates, etc, for compound <b>20</b> | 28–36         |

Compound **6**. Oxalate

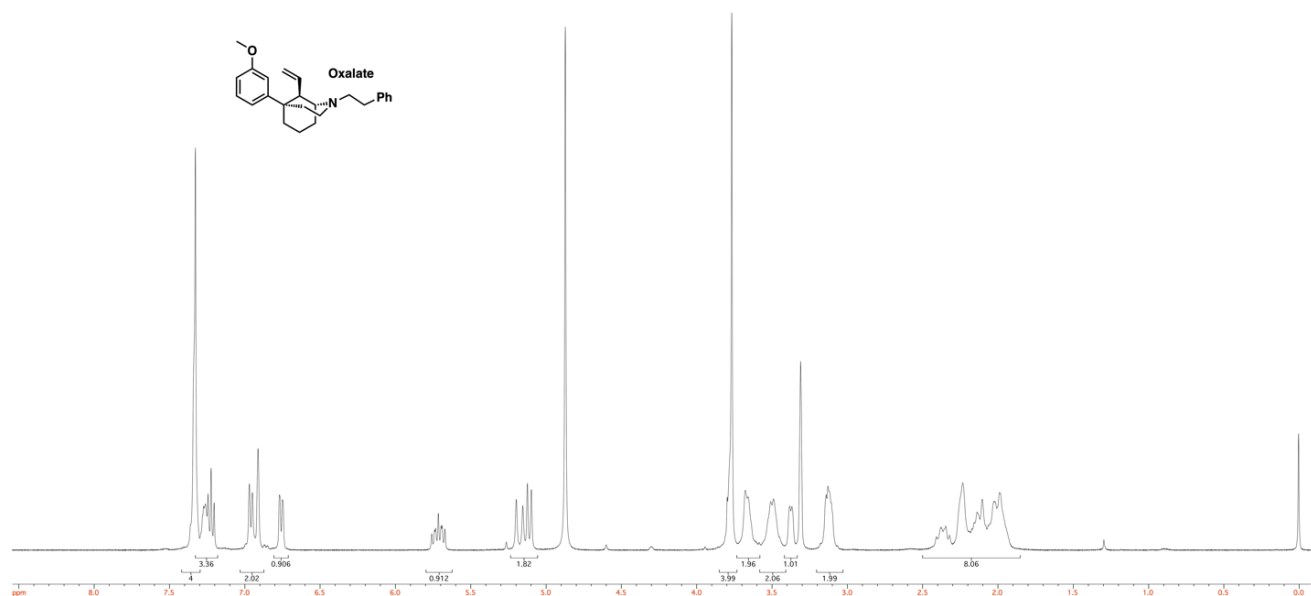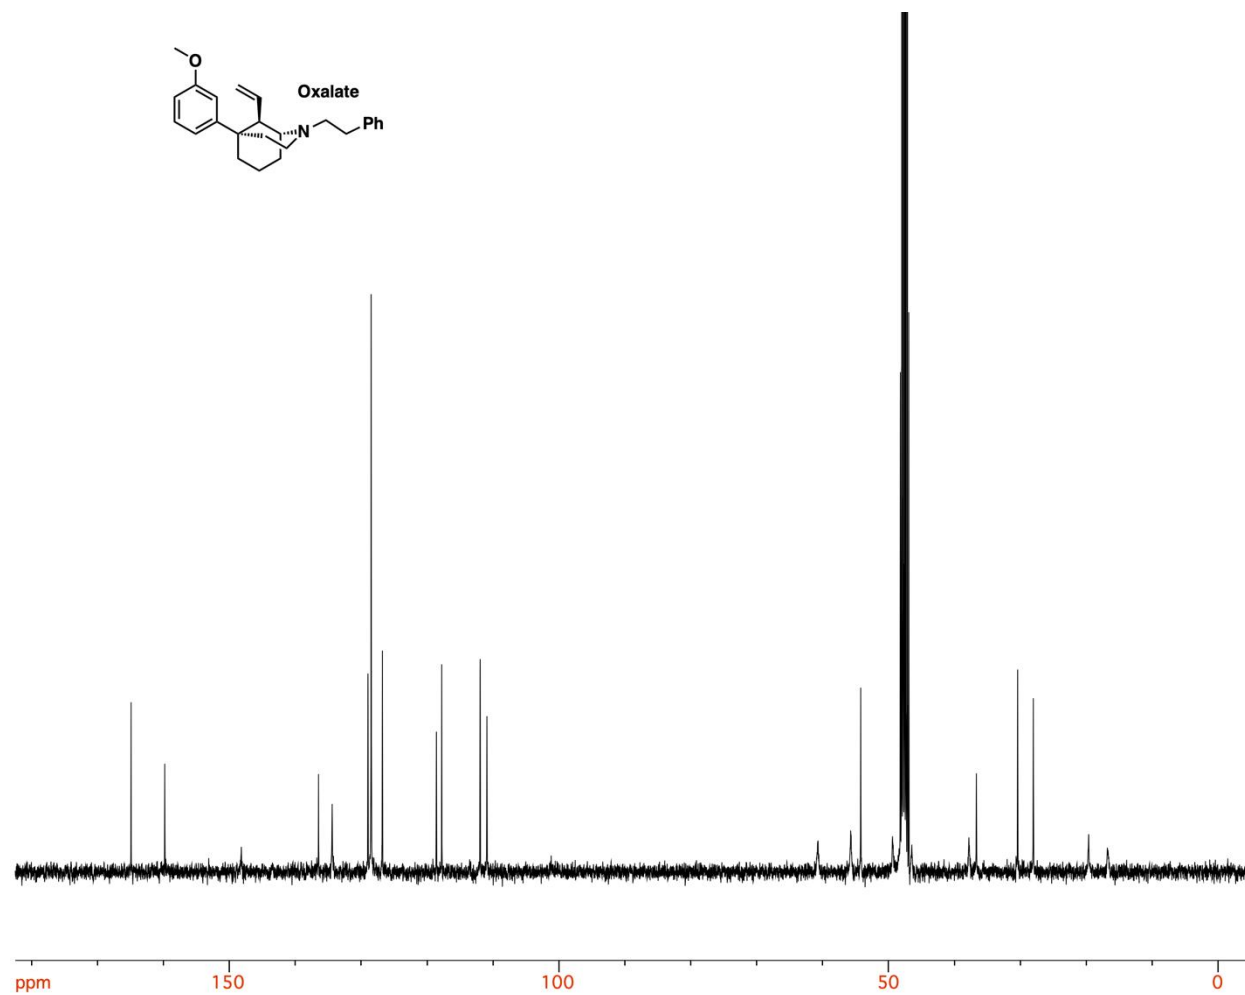

# Compound 7.oxalate

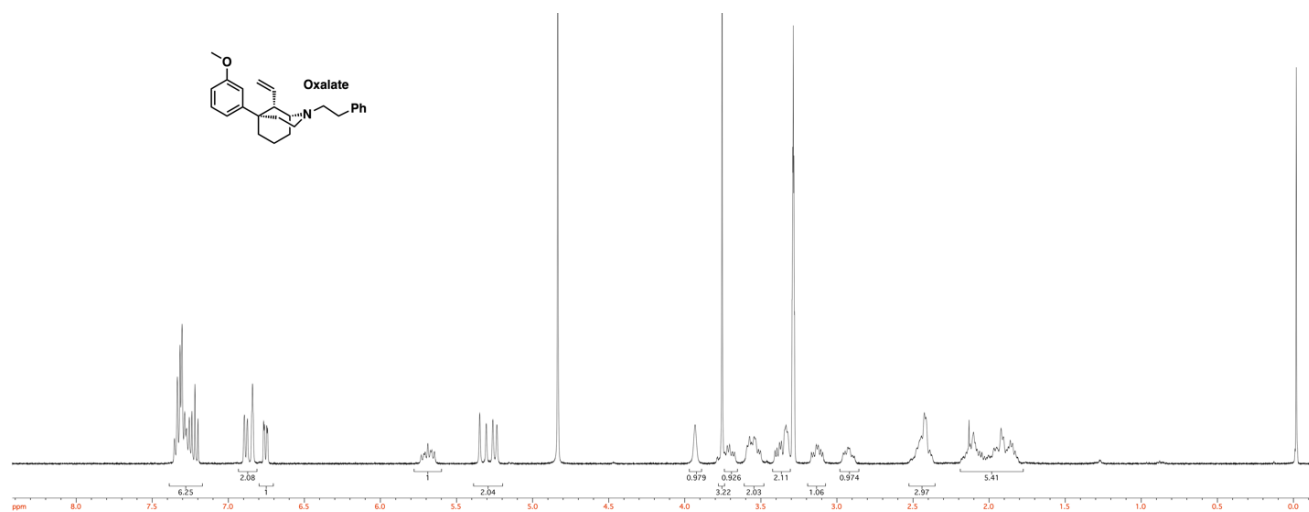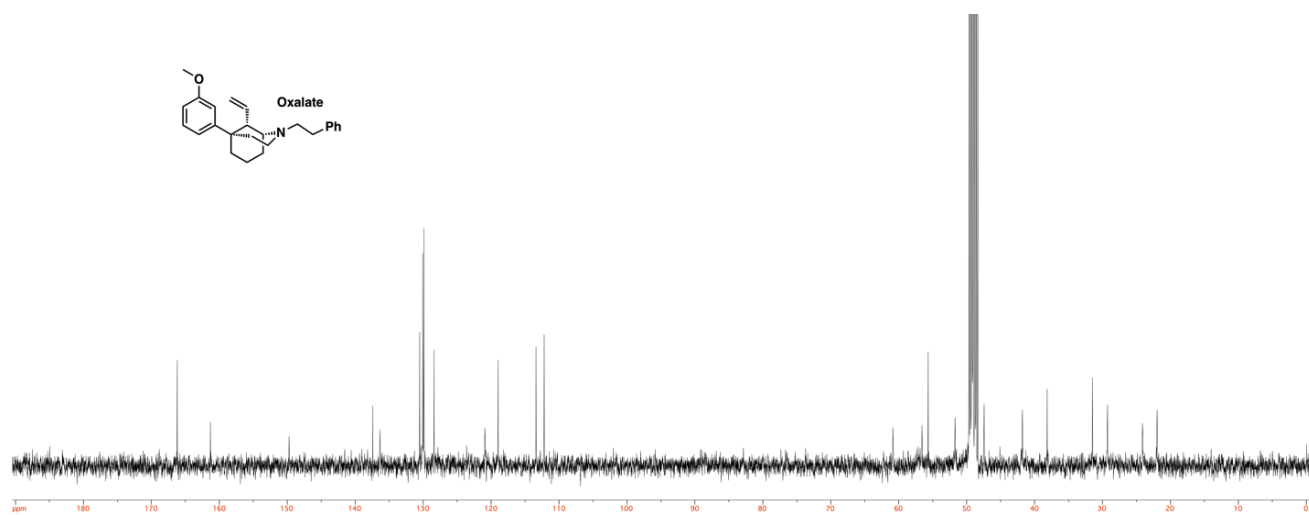

# Compound 8

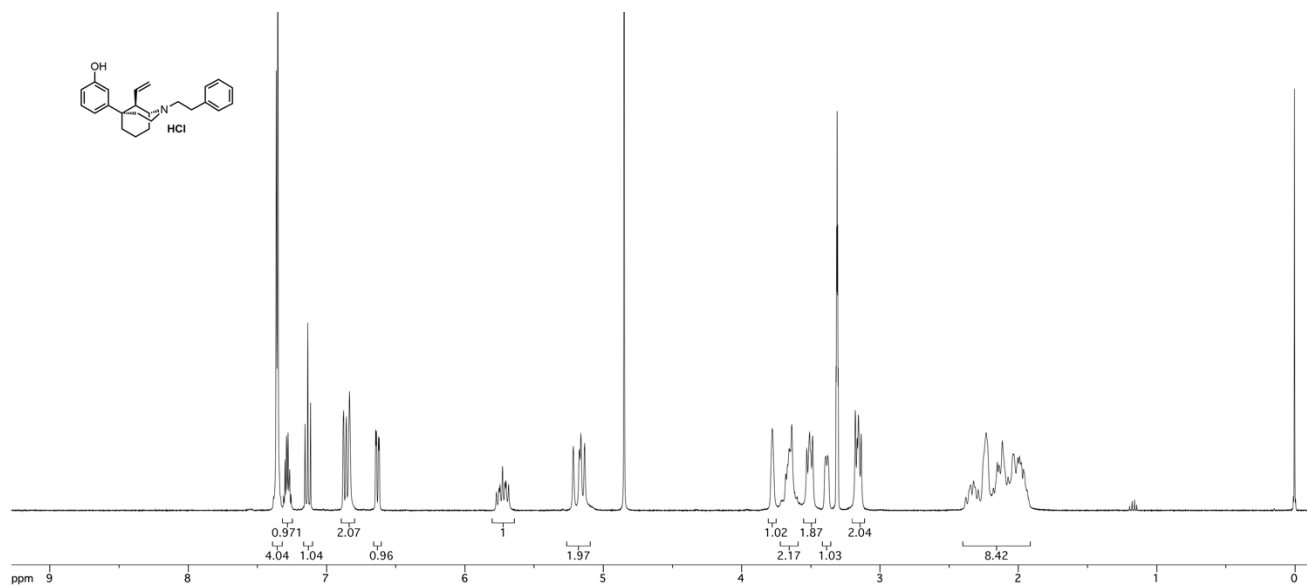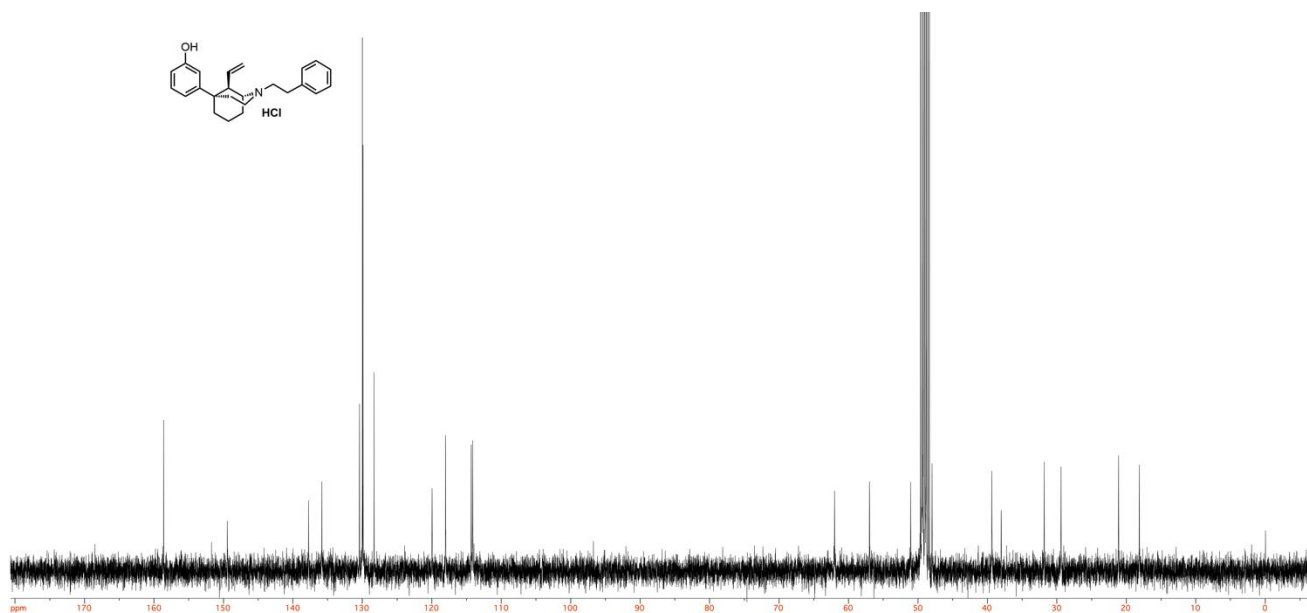

Compound **9**.

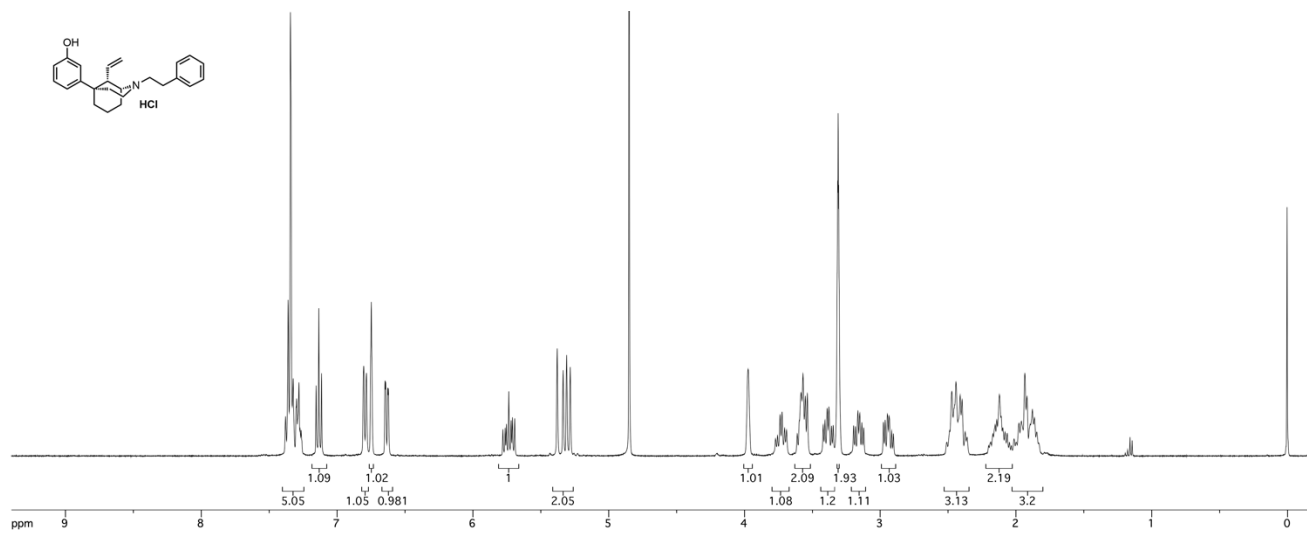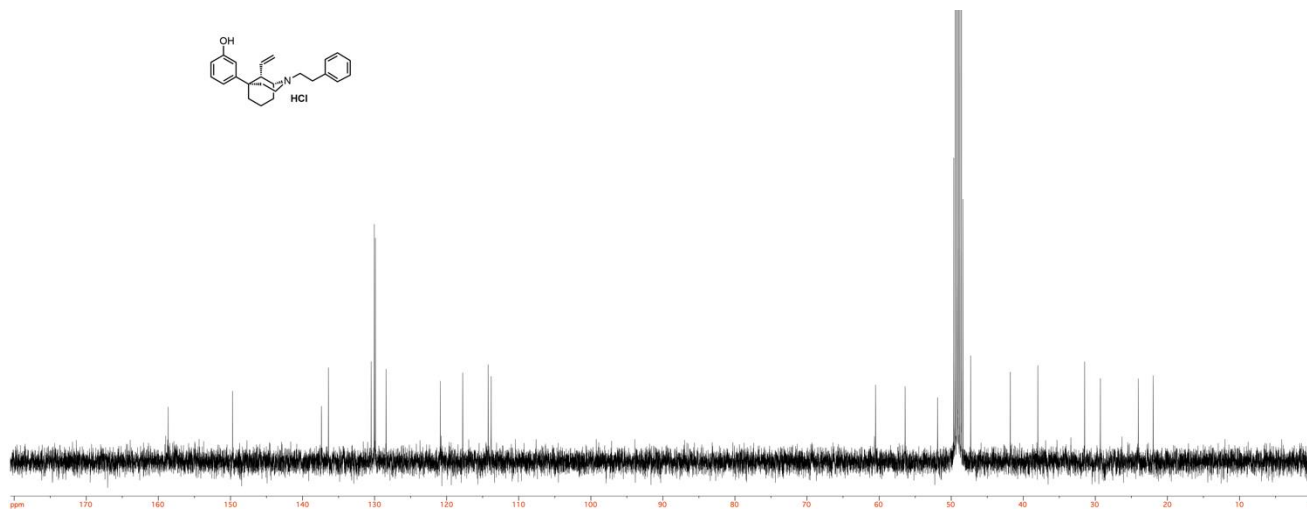

# Compound **12.oxalate**

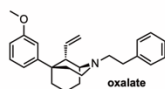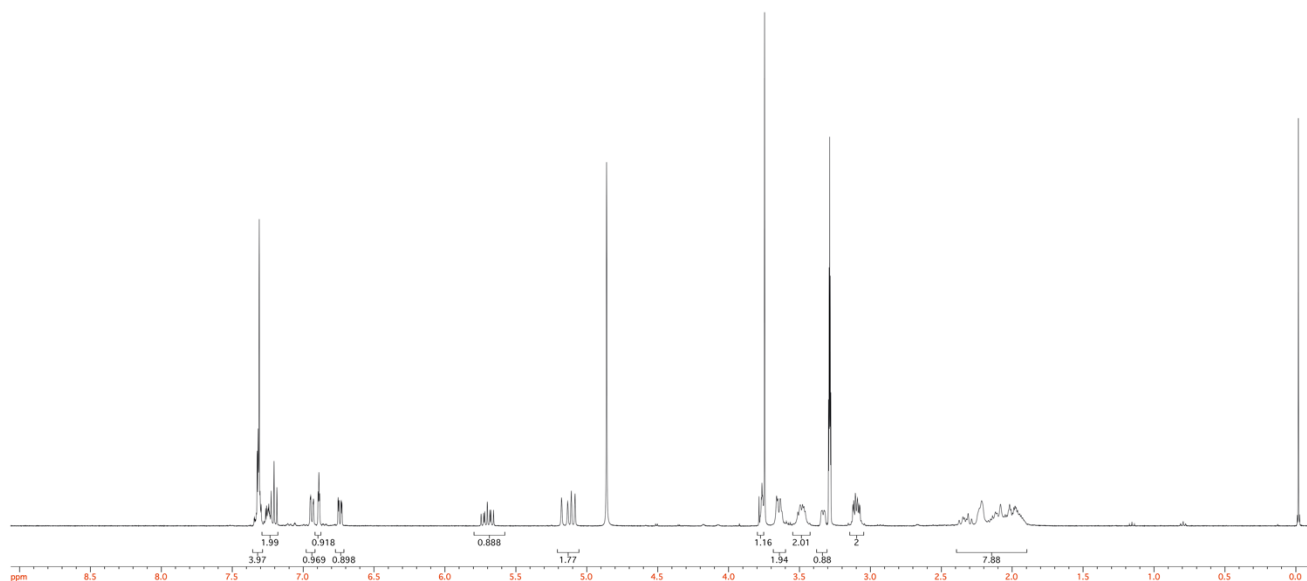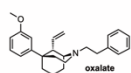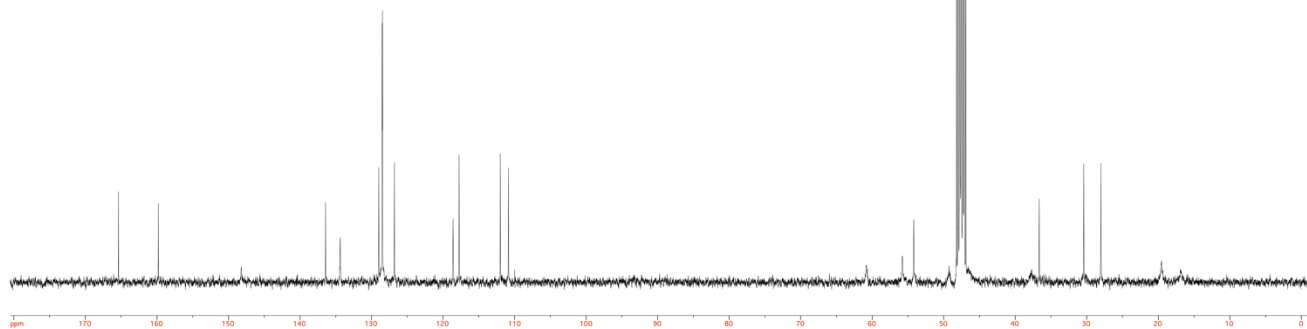

# Compound 13.oxalate

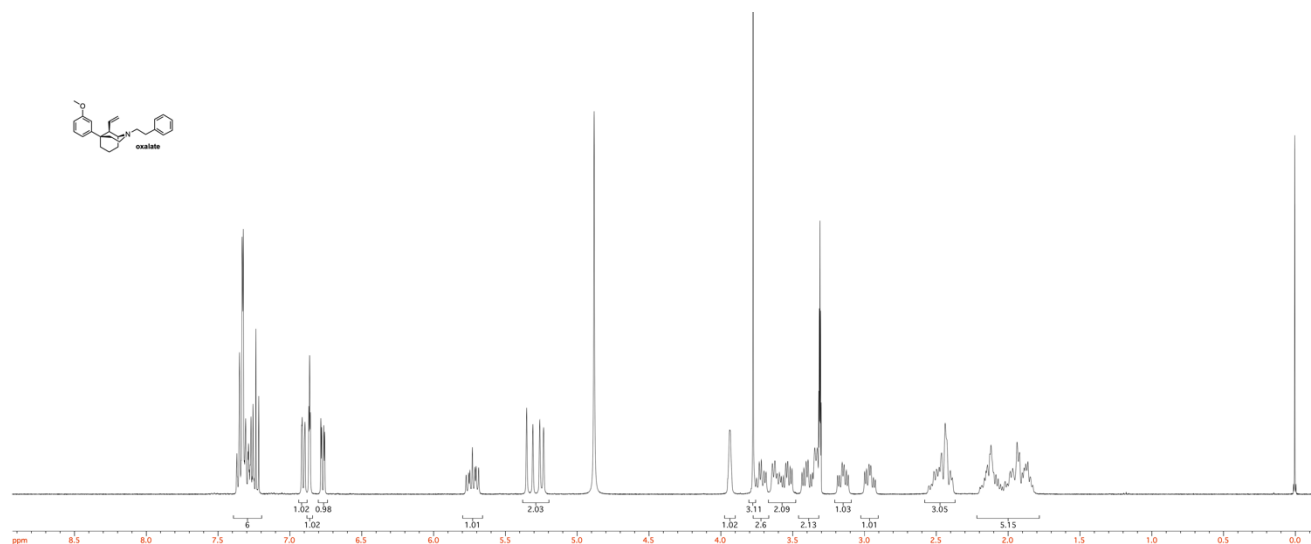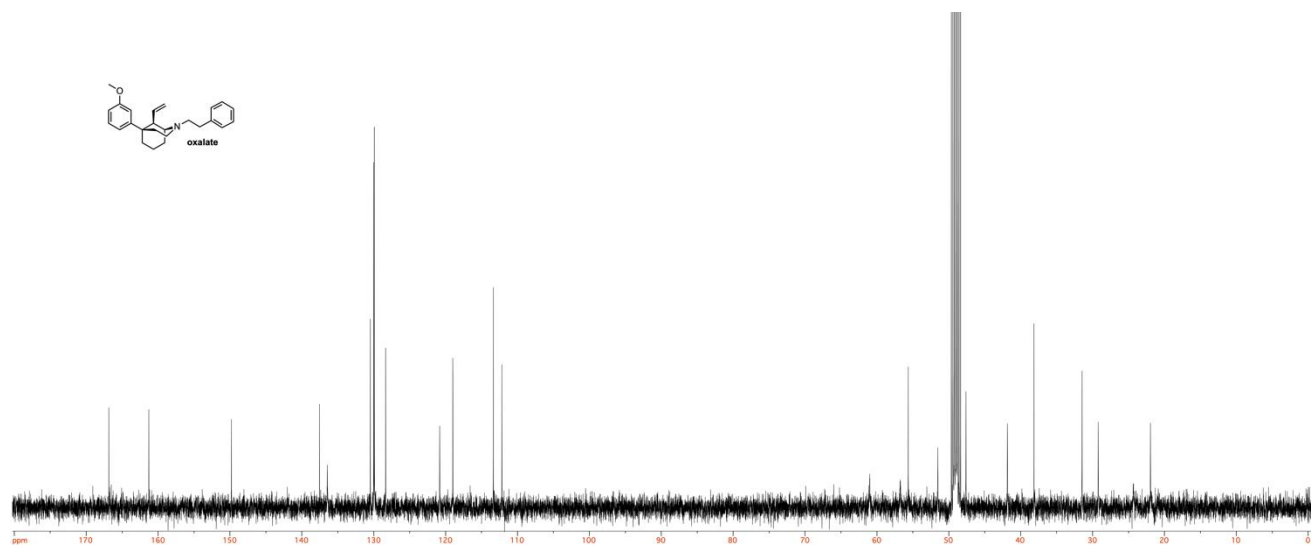



# Compound 14

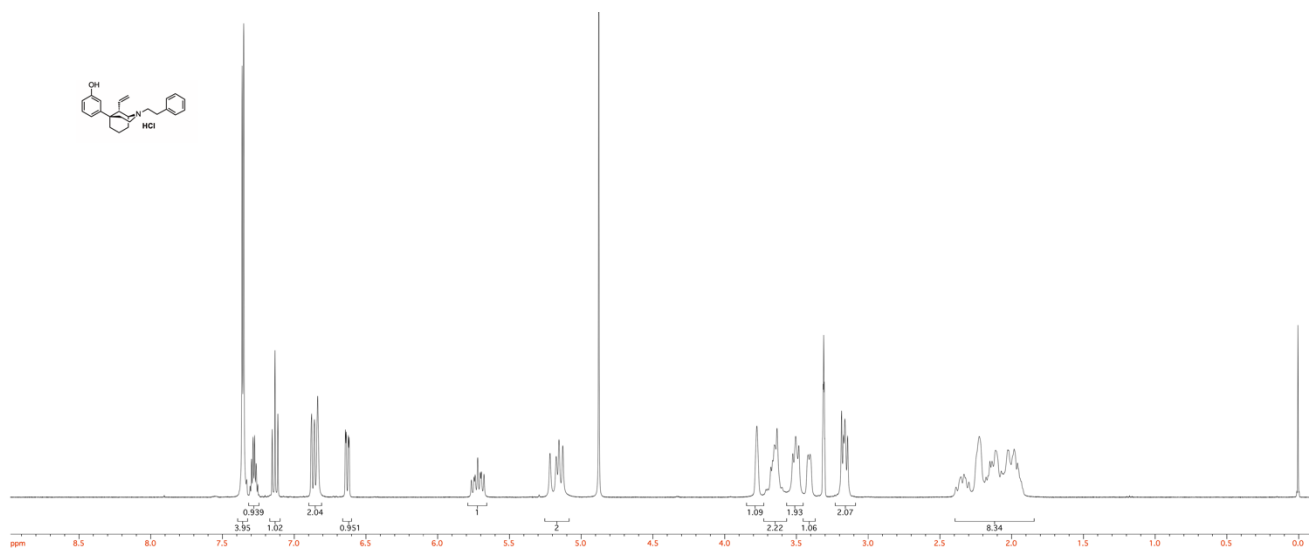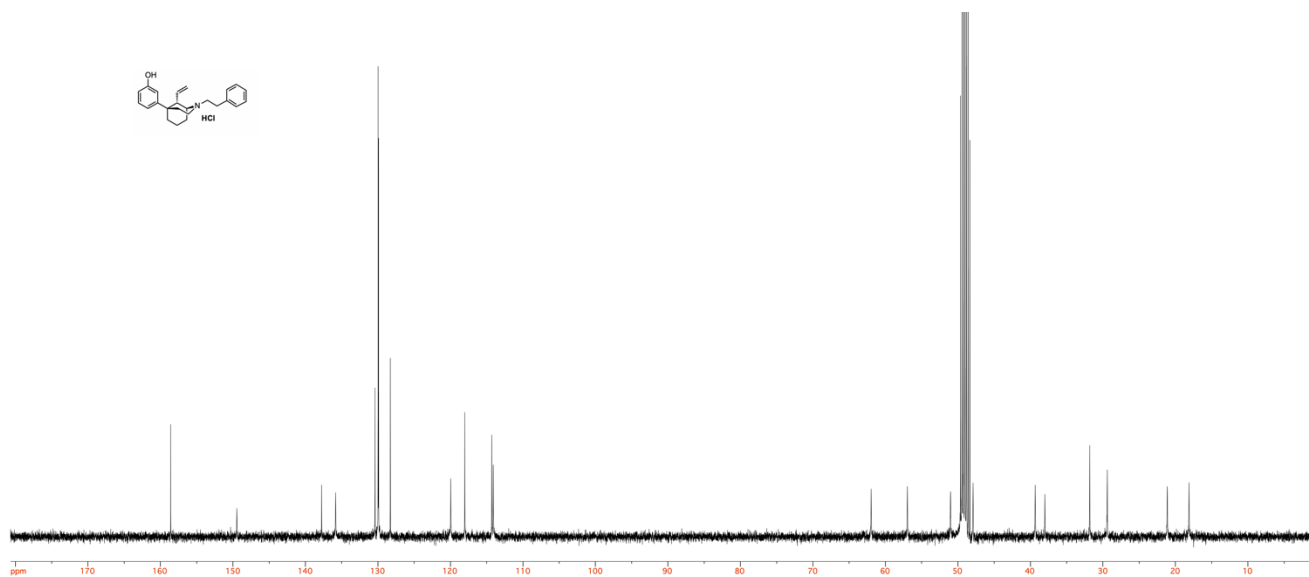

# Compound 15

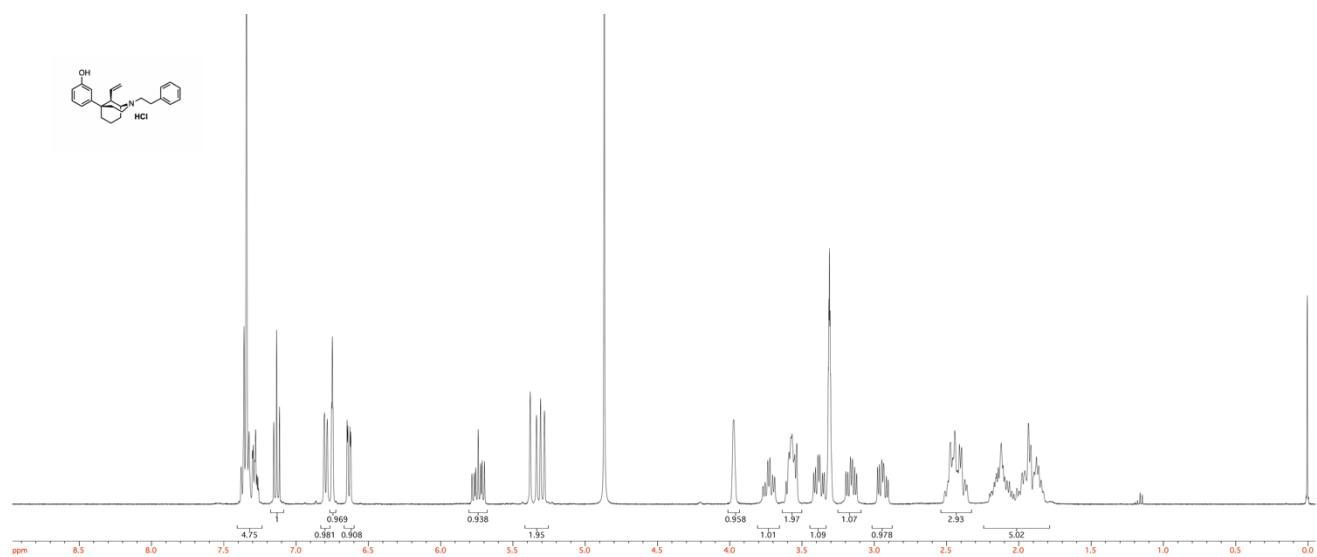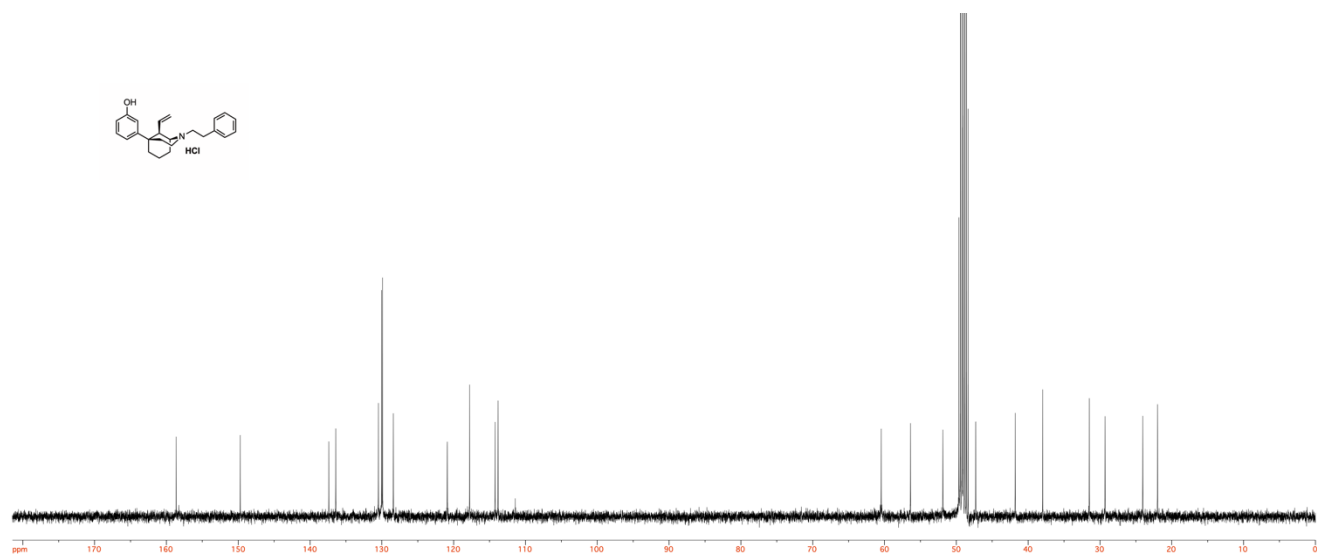

# Compound **17**

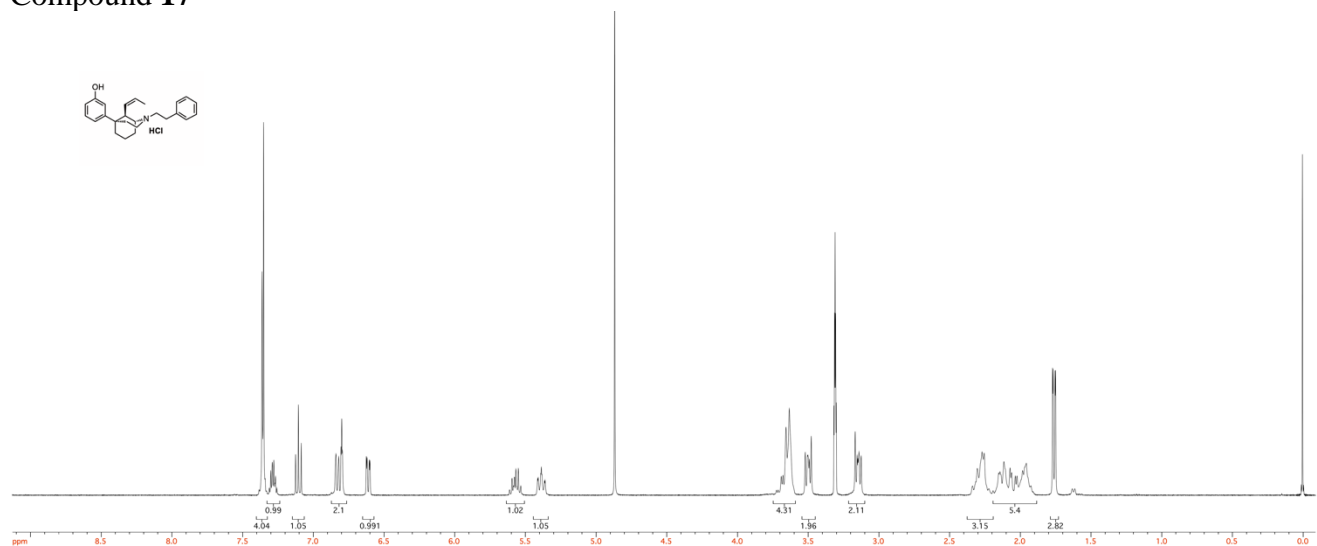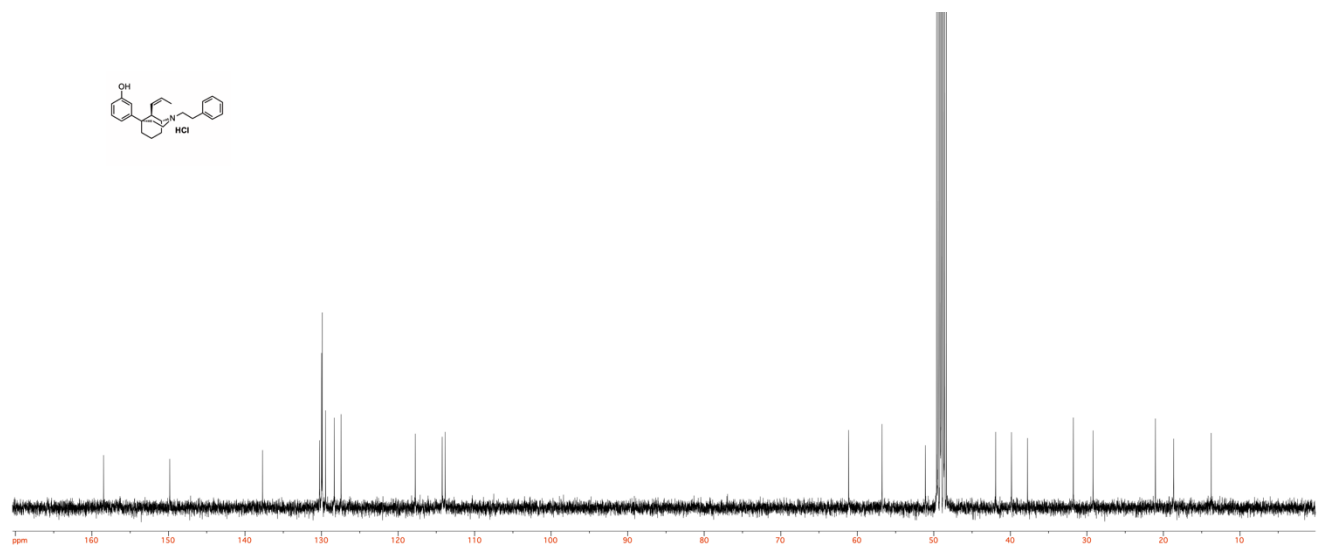

# Compound 18

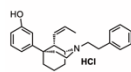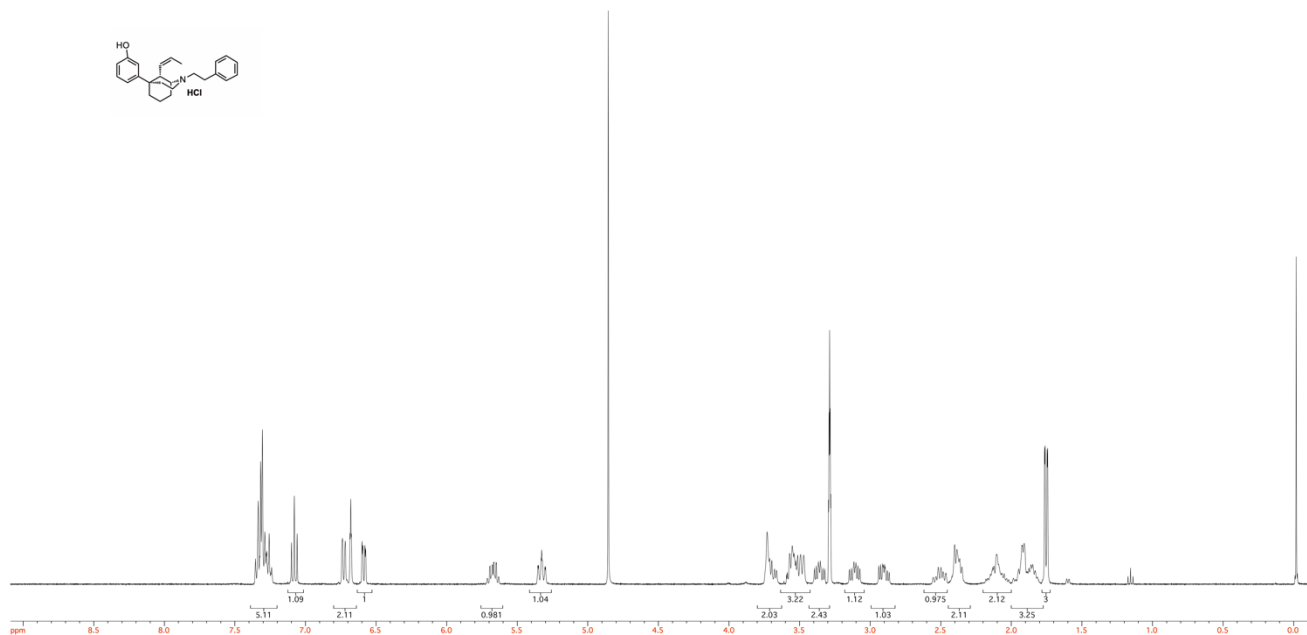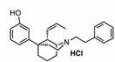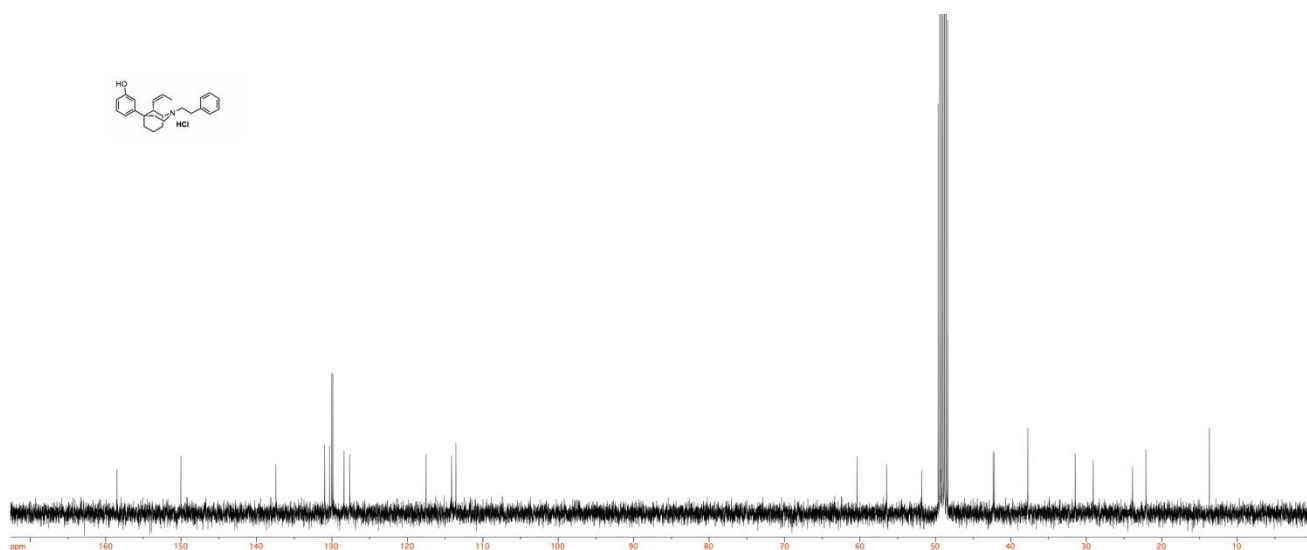

# Compound 20

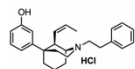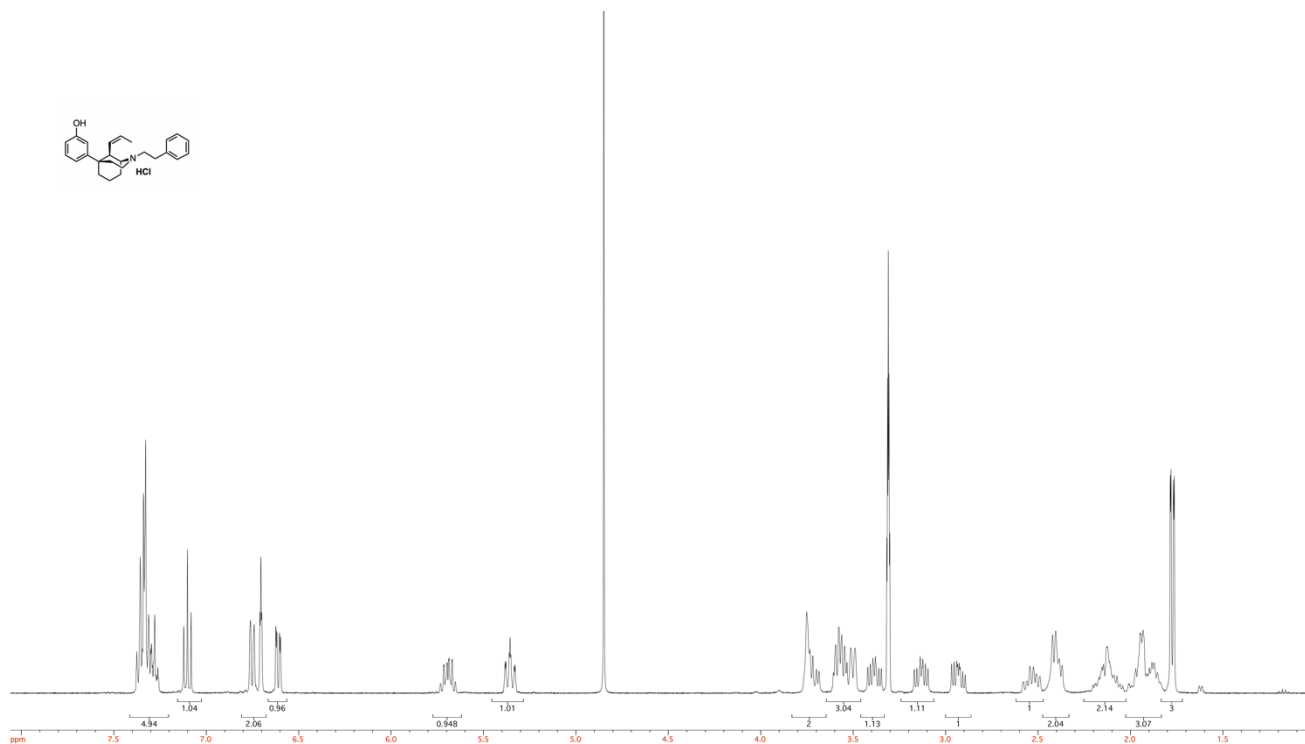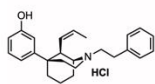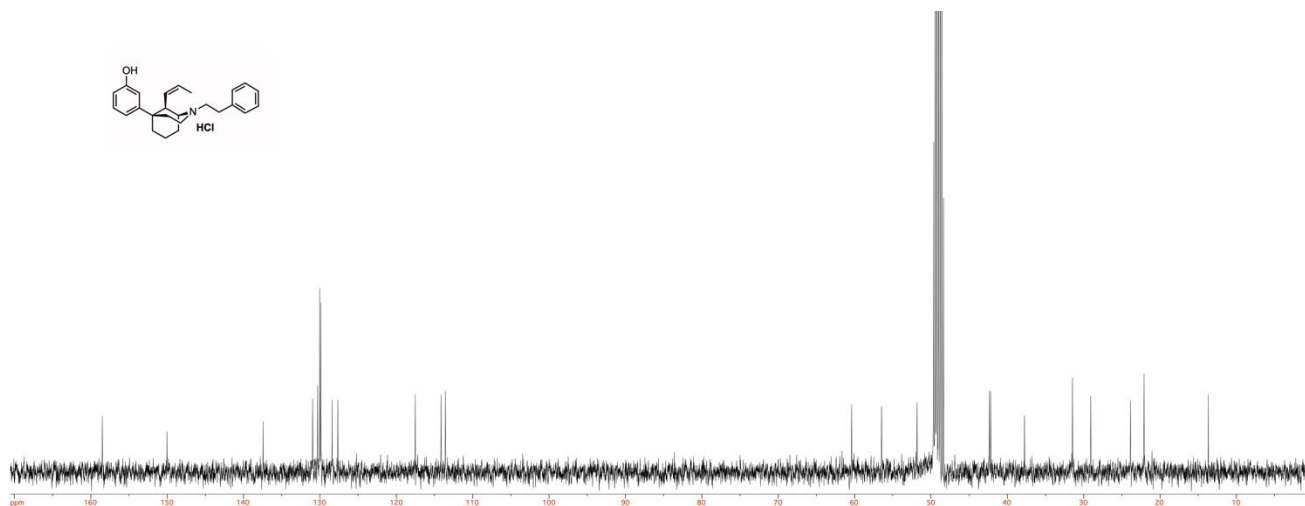

# Compound 21

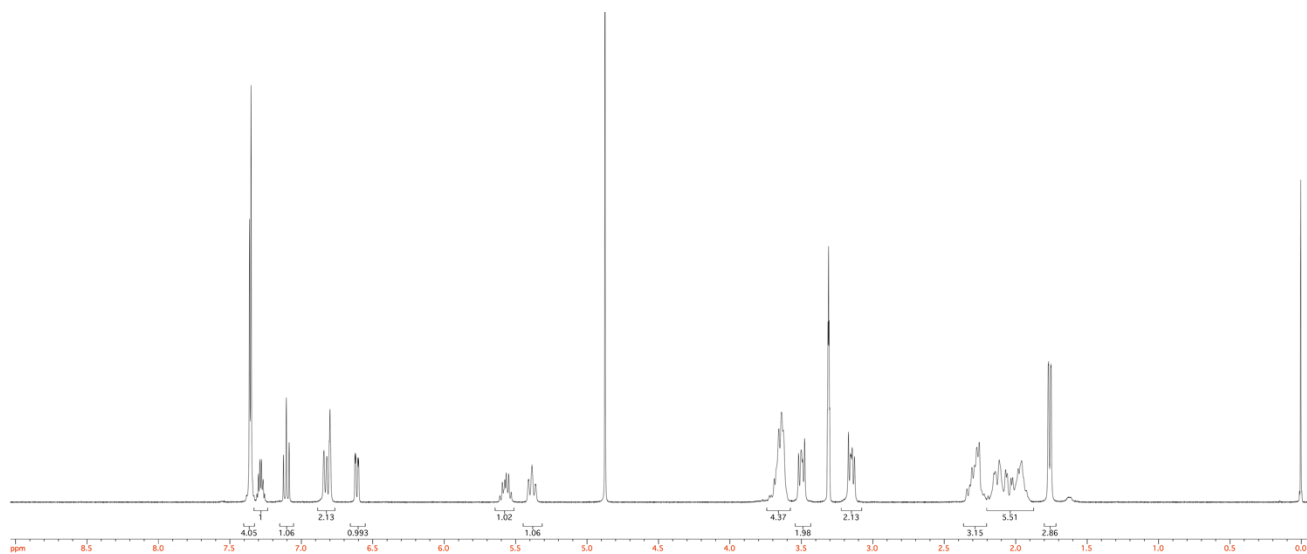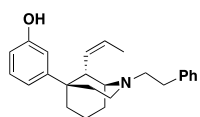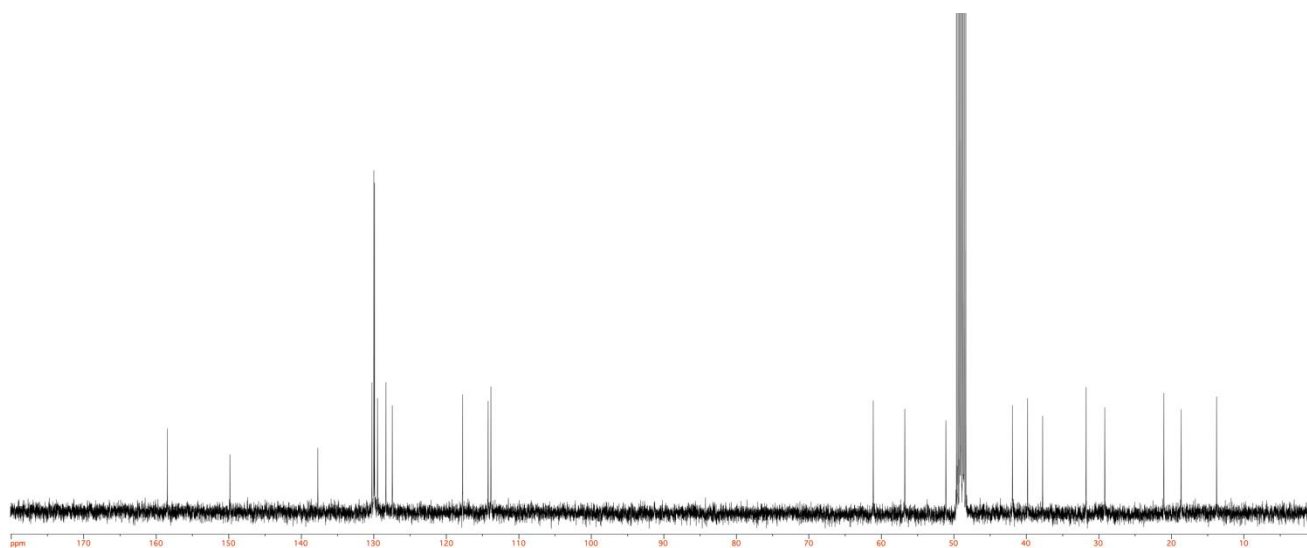

Compound **23**

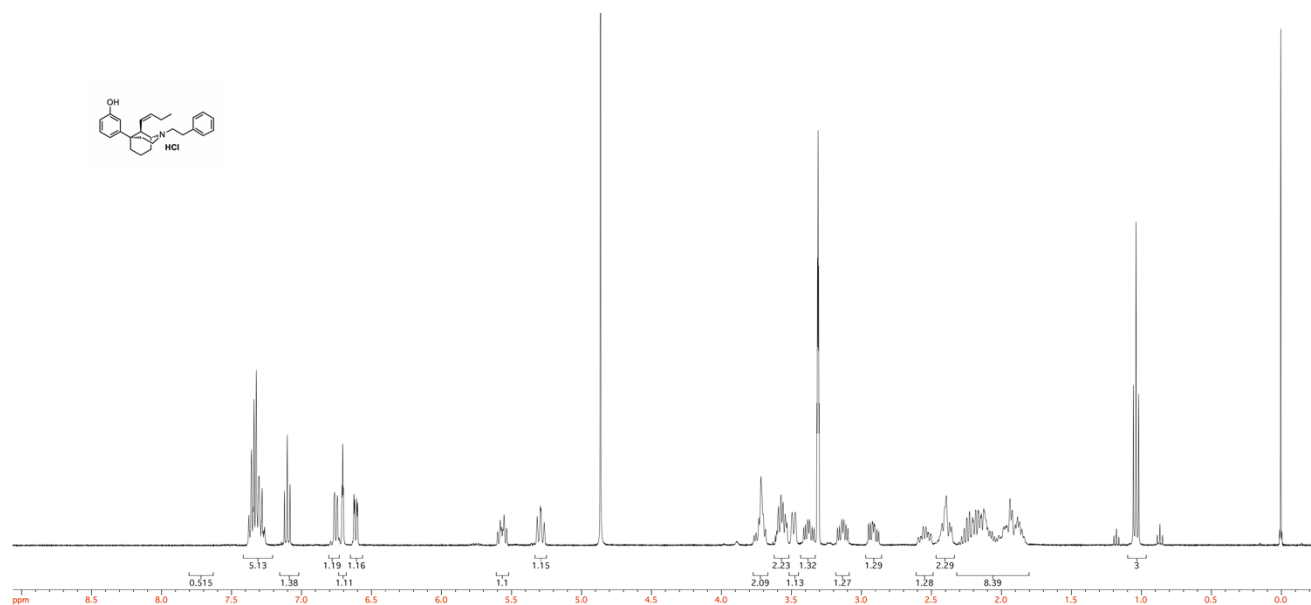

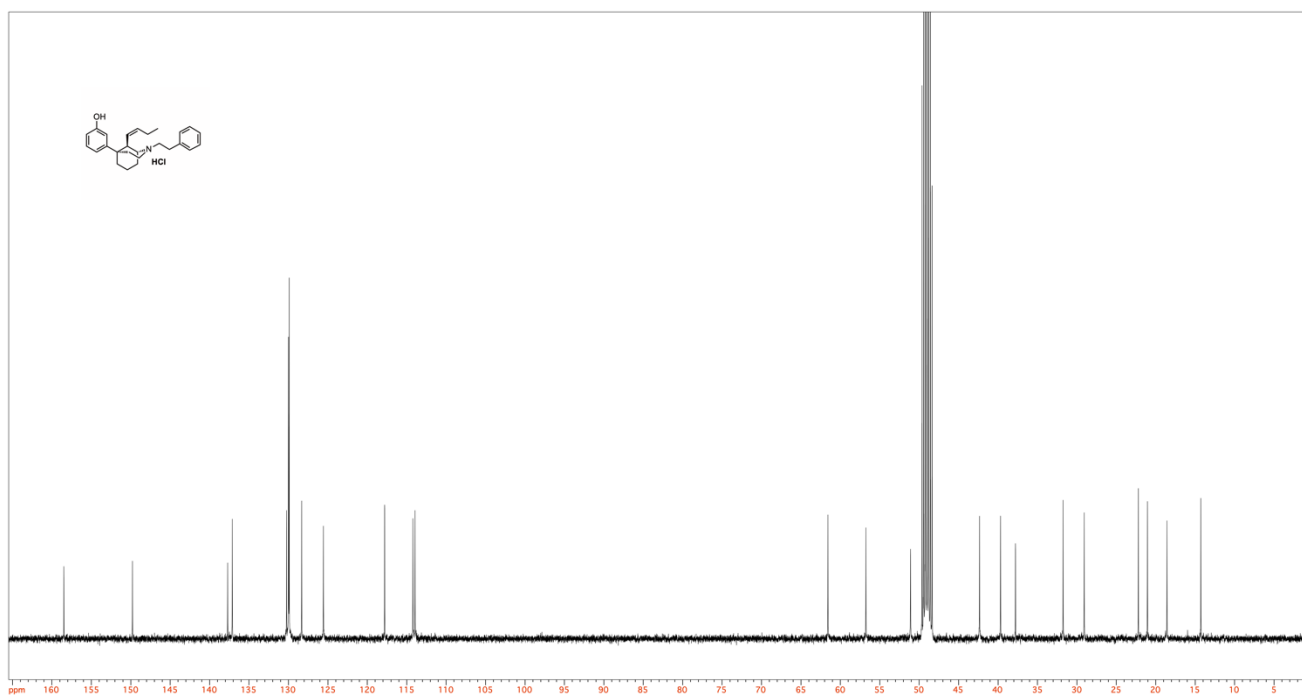

Compound **24**

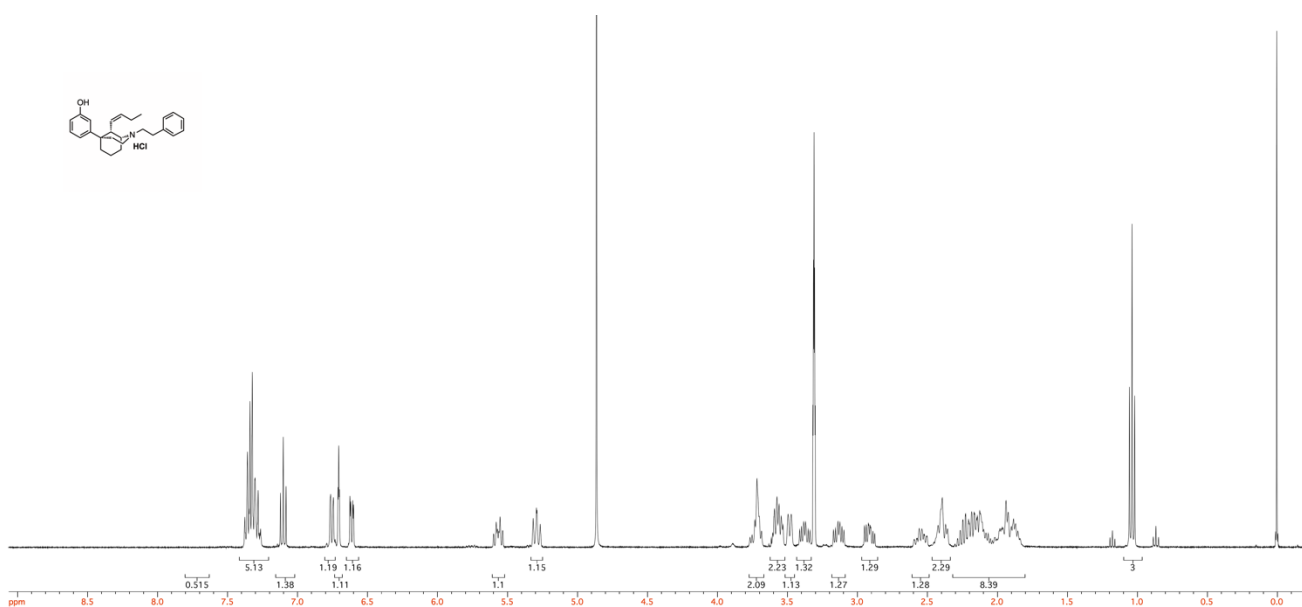



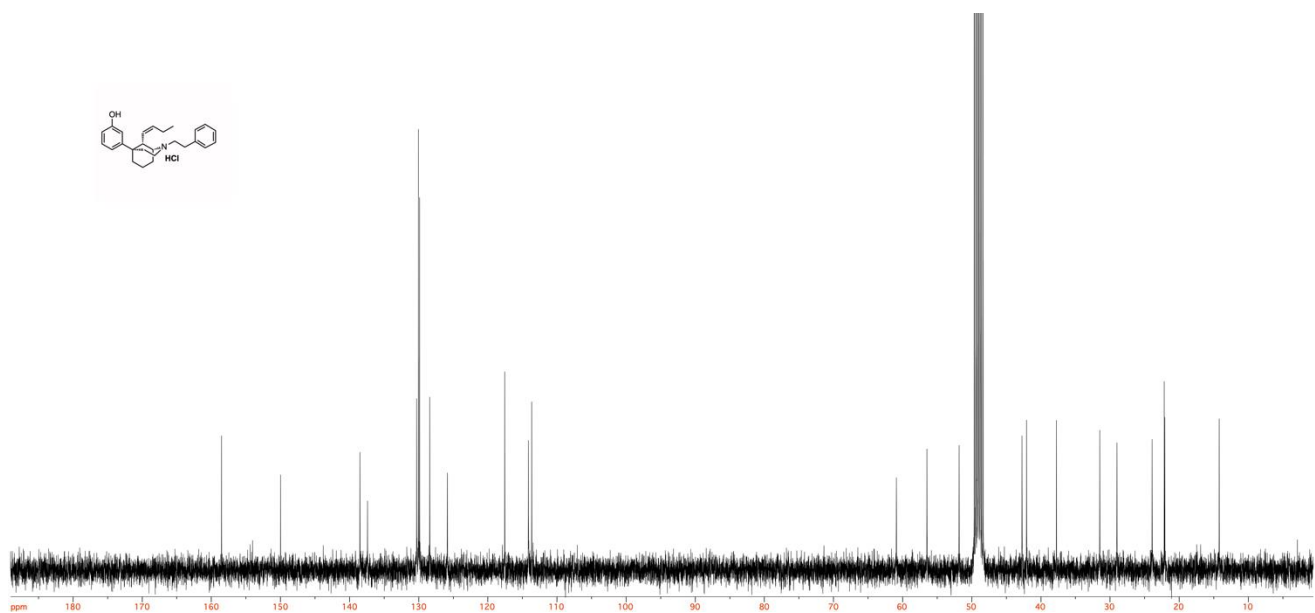

# Compound 26

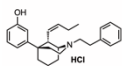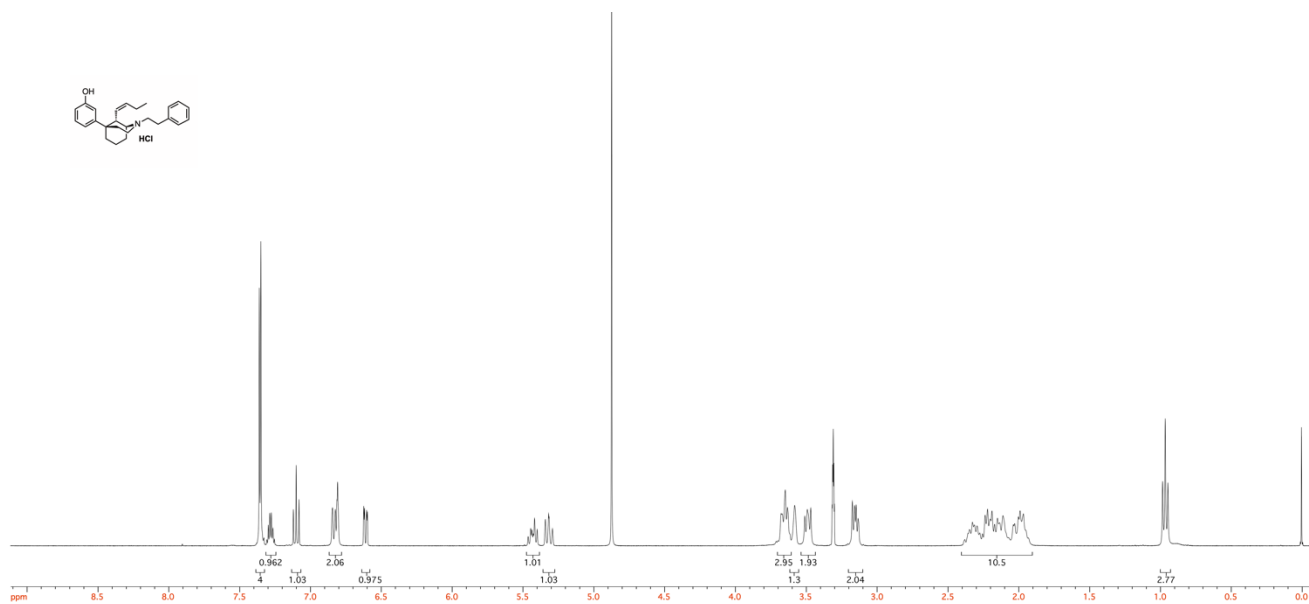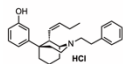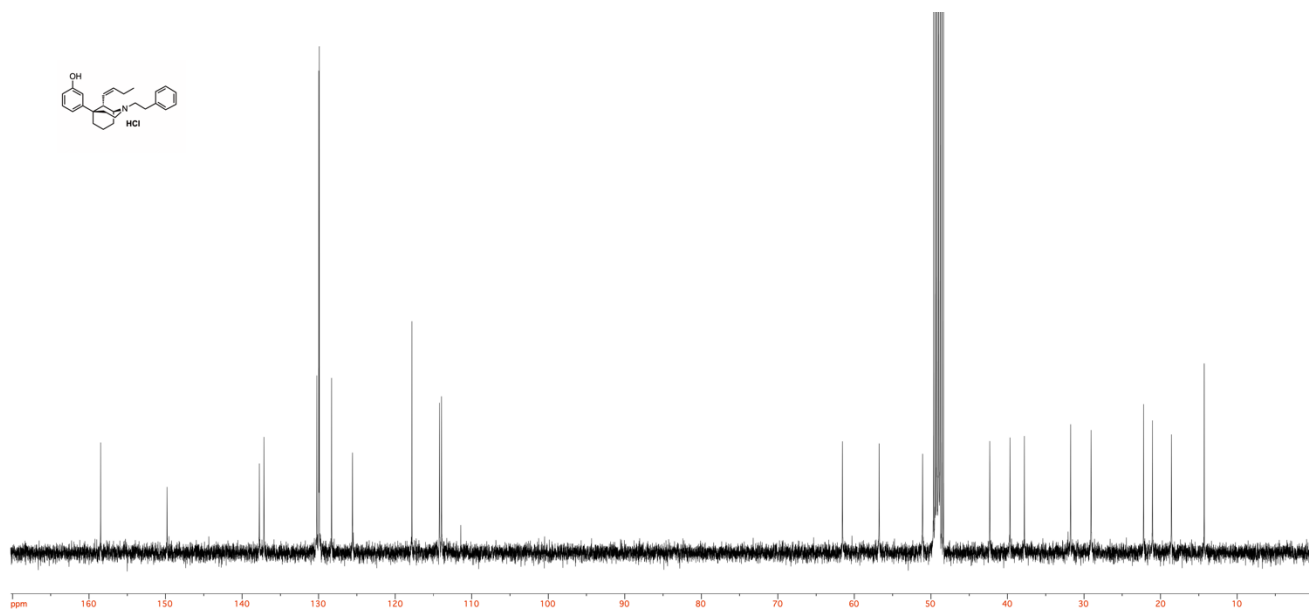

# Compound 27

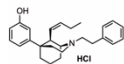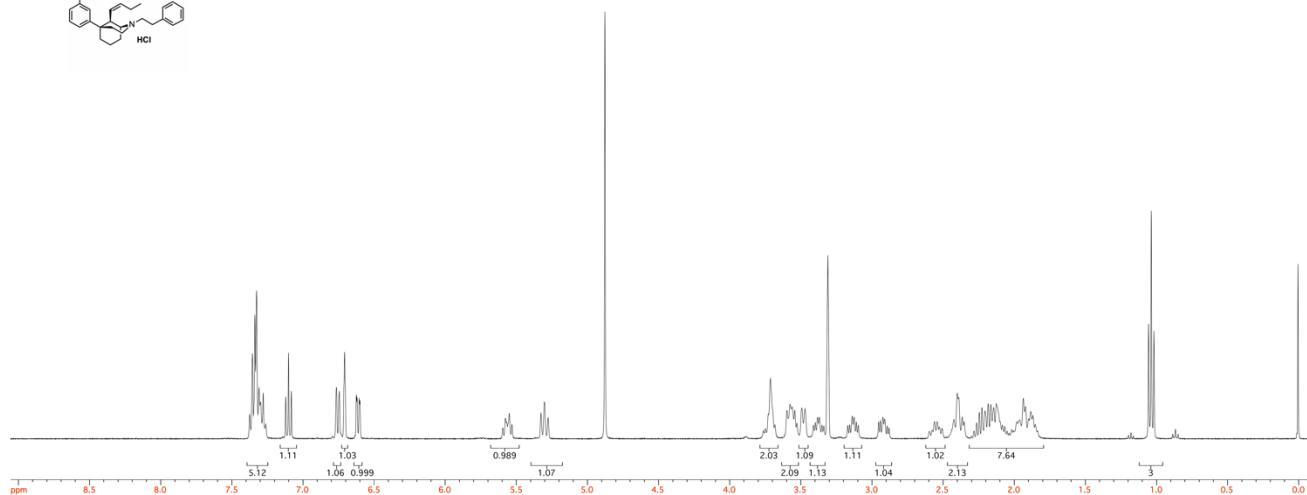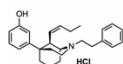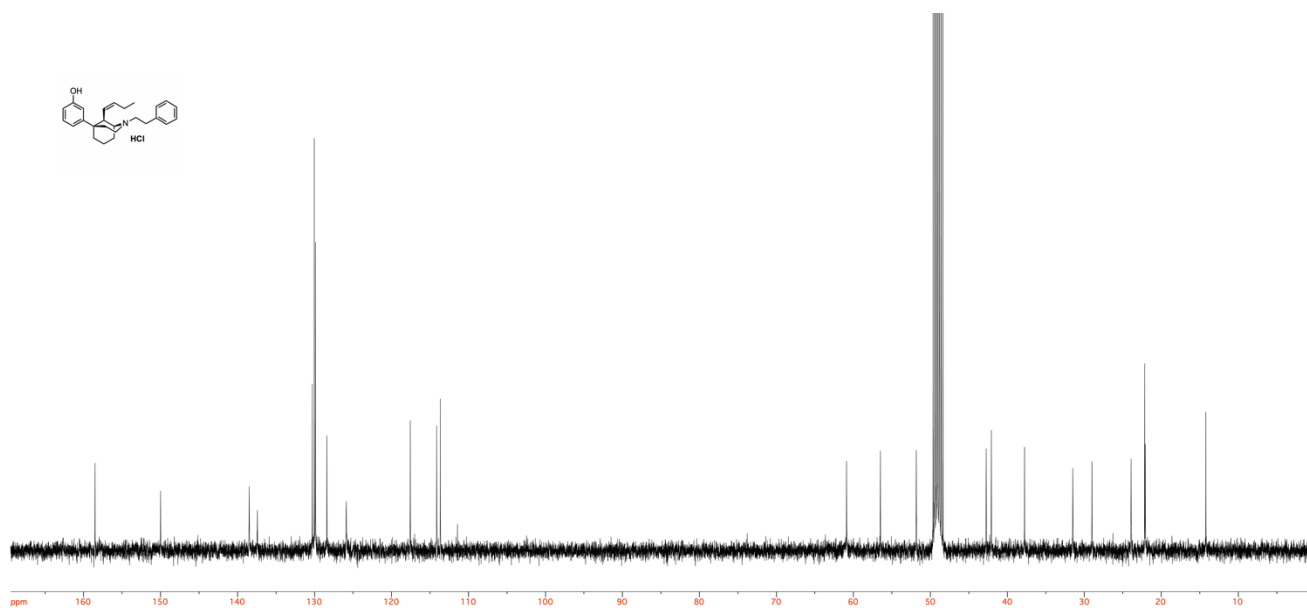

**Table S1.** Crystal data and structure refinement for Compound **8**

|                                   |                                                   |                  |
|-----------------------------------|---------------------------------------------------|------------------|
| Identification code               | knih132                                           |                  |
| Empirical formula                 | C <sub>24</sub> H <sub>30</sub> ClNO              |                  |
| Formula weight                    | 383.94                                            |                  |
| Temperature                       | 293(2) K                                          |                  |
| Wavelength                        | 1.54178 Å                                         |                  |
| Crystal system                    | Monoclinic                                        |                  |
| Space group                       | P2 <sub>1</sub>                                   |                  |
| Unit cell dimensions              | a = 9.0396(2) Å                                   | ∠ = 90°.         |
|                                   | b = 9.0396(2) Å                                   | ∠ = 9.0396(2) °. |
|                                   | c = 9.0396(2) Å                                   | ∠ = 90°.         |
| Volume                            | 9.0396(2) Å <sup>3</sup>                          |                  |
| Z                                 | 2                                                 |                  |
| Density (20°C)                    | 1.214 Mg/m <sup>3</sup>                           |                  |
| Absorption coefficient            | 1.694 mm <sup>-1</sup>                            |                  |
| F(000)                            | 412                                               |                  |
| Crystal size                      | 0.205 x 0.168 x 0.060 mm <sup>3</sup>             |                  |
| Theta range for data collection   | 4.713 to 74.487°.                                 |                  |
| Index ranges                      | -11 ≤ h ≤ 11, -13 ≤ k ≤ 14, -11 ≤ l ≤ 11          |                  |
| Reflections collected             | 21280                                             |                  |
| Independent reflections           | 4103 [R <sub>int</sub> = 0.0197]                  |                  |
| Completeness to theta = 67.679°   | 99.4 %                                            |                  |
| Absorption correction             | Semi-empirical from equivalents                   |                  |
| Max. and min. transmission        | 0.7538 and 0.6809                                 |                  |
| Refinement method                 | Full-matrix least-squares on F <sup>2</sup>       |                  |
| Data / restraints / parameters    | 4103 / 1 / 251                                    |                  |
| Goodness-of-fit on F <sup>2</sup> | 1.050                                             |                  |
| Final R indices [I > 2σ(I)]       | R <sub>1</sub> = 0.0277, wR <sub>2</sub> = 0.0764 |                  |
| R indices (all data)              | R <sub>1</sub> = 0.0281, wR <sub>2</sub> = 0.0768 |                  |
| Absolute structure parameter      | 0.038(3)                                          |                  |
| Largest diff. peak and hole       | 0.295 and -0.240 e.Å <sup>-3</sup>                |                  |

**Table S2.** Atomic coordinates ( $\times 10^4$ ) and equivalent isotropic displacement parameters ( $\text{\AA}^2 \times 10^3$ ) for DC-01-00-76.1. U(eq) is defined as one third of the trace of the orthogonalized  $U_{ij}$  tensor.

|        | x        | y       | z        | U(eq) |
|--------|----------|---------|----------|-------|
| C(1)   | 4831(2)  | 5236(2) | 7119(2)  | 34(1) |
| N(2)   | 4632(2)  | 4657(1) | 8521(2)  | 34(1) |
| C(3)   | 3367(2)  | 5084(2) | 9355(2)  | 38(1) |
| C(4)   | 1964(2)  | 5265(2) | 8441(2)  | 39(1) |
| C(5)   | 2151(2)  | 5792(1) | 6964(2)  | 32(1) |
| C(6)   | 2635(2)  | 6981(2) | 7072(2)  | 41(1) |
| C(7)   | 4158(2)  | 7175(2) | 7793(2)  | 45(1) |
| C(8)   | 5340(2)  | 6402(2) | 7287(2)  | 43(1) |
| C(9)   | 3372(2)  | 5128(1) | 6234(2)  | 33(1) |
| C(10)  | 3624(2)  | 5434(2) | 4706(2)  | 45(1) |
| C(11)  | 3706(3)  | 4742(3) | 3687(3)  | 73(1) |
| C(12)  | 6004(2)  | 4597(2) | 9471(2)  | 40(1) |
| C(13)  | 7325(2)  | 4157(2) | 8697(2)  | 49(1) |
| C(14)  | 8596(2)  | 3826(2) | 9687(2)  | 44(1) |
| C(15)  | 9432(3)  | 2924(2) | 9368(3)  | 59(1) |
| C(16)  | 10656(3) | 2637(2) | 10215(4) | 70(1) |
| C(17)  | 11054(2) | 3233(3) | 11387(3) | 66(1) |
| C(18)  | 10240(3) | 4130(3) | 11731(3) | 59(1) |
| C(19)  | 9014(2)  | 4420(2) | 10885(2) | 50(1) |
| C(20)  | 671(2)   | 5678(2) | 6114(2)  | 34(1) |
| C(21)  | 61(2)    | 4658(2) | 5865(2)  | 41(1) |
| C(22)  | -1267(2) | 4548(2) | 5094(2)  | 46(1) |
| C(23)  | -2017(2) | 5433(2) | 4532(2)  | 43(1) |
| O(24)  | -2126(2) | 7361(2) | 4325(3)  | 79(1) |
| C(24)  | -1431(2) | 6444(2) | 4786(2)  | 47(1) |
| C(25)  | -107(2)  | 6563(2) | 5573(2)  | 45(1) |
| Cl(26) | 5708(1)  | 7177(1) | 1751(1)  | 61(1) |

**Table S3.** Bond lengths [Å] and angles [°] for DC-01-00-76.1.

|                 |            |                  |            |
|-----------------|------------|------------------|------------|
| C(1)-N(2)       | 1.515(2)   | C(1)-C(8)        | 1.522(3)   |
| C(1)-C(9)       | 1.539(2)   | C(1)-H(1)        | 0.9800     |
| N(2)-C(12)      | 1.503(2)   | N(2)-C(3)        | 1.505(2)   |
| N(2)-H(2)       | 0.93(3)    | C(3)-C(4)        | 1.523(2)   |
| C(3)-H(3A)      | 0.9700     | C(3)-H(3B)       | 0.9700     |
| C(4)-C(5)       | 1.548(2)   | C(4)-H(4A)       | 0.9700     |
| C(4)-H(4B)      | 0.9700     | C(5)-C(6)        | 1.538(2)   |
| C(5)-C(20)      | 1.540(2)   | C(5)-C(9)        | 1.554(2)   |
| C(6)-C(7)       | 1.532(2)   | C(6)-H(6A)       | 0.9700     |
| C(6)-H(6B)      | 0.9700     | C(7)-C(8)        | 1.523(3)   |
| C(7)-H(7A)      | 0.9700     | C(7)-H(7B)       | 0.9700     |
| C(8)-H(8A)      | 0.9700     | C(8)-H(8B)       | 0.9700     |
| C(9)-C(10)      | 1.509(2)   | C(9)-H(9A)       | 0.9800     |
| C(10)-C(11)     | 1.288(4)   | C(10)-H(10)      | 0.9300     |
| C(11)-H(11A)    | 0.9300     | C(11)-H(11B)     | 0.9300     |
| C(12)-C(13)     | 1.520(3)   | C(12)-H(12A)     | 0.9700     |
| C(12)-H(12B)    | 0.9700     | C(13)-C(14)      | 1.509(3)   |
| C(13)-H(13A)    | 0.9700     | C(13)-H(13B)     | 0.9700     |
| C(14)-C(19)     | 1.385(3)   | C(14)-C(15)      | 1.387(3)   |
| C(15)-C(16)     | 1.386(4)   | C(15)-H(15)      | 0.9300     |
| C(16)-C(17)     | 1.363(5)   | C(16)-H(16)      | 0.9300     |
| C(17)-C(18)     | 1.377(4)   | C(17)-H(17)      | 0.9300     |
| C(18)-C(19)     | 1.388(3)   | C(18)-H(18)      | 0.9300     |
| C(19)-H(19)     | 0.9300     | C(20)-C(25)      | 1.388(3)   |
| C(20)-C(21)     | 1.395(3)   | C(21)-C(22)      | 1.386(3)   |
| C(21)-H(21)     | 0.9300     | C(22)-C(23)      | 1.383(3)   |
| C(22)-H(22)     | 0.9300     | C(23)-C(24)      | 1.377(3)   |
| C(23)-H(23)     | 0.9300     | O(24)-C(24)      | 1.361(3)   |
| O(24)-H(24)     | 0.88(4)    | C(24)-C(25)      | 1.393(3)   |
| C(25)-H(25)     | 0.9300     |                  |            |
|                 |            |                  |            |
| N(2)-C(1)-C(8)  | 113.82(15) | N(2)-C(1)-C(9)   | 107.59(13) |
| C(8)-C(1)-C(9)  | 112.82(15) | N(2)-C(1)-H(1)   | 107.4      |
| C(8)-C(1)-H(1)  | 107.4      | C(9)-C(1)-H(1)   | 107.4      |
| C(12)-N(2)-C(3) | 109.56(14) | C(12)-N(2)-C(1)  | 114.72(13) |
| C(3)-N(2)-C(1)  | 113.64(14) | C(12)-N(2)-H(2)  | 104.7(16)  |
| C(3)-N(2)-H(2)  | 109.9(16)  | C(1)-N(2)-H(2)   | 103.7(16)  |
| N(2)-C(3)-C(4)  | 113.10(14) | N(2)-C(3)-H(3A)  | 109.0      |
| C(4)-C(3)-H(3A) | 109.0      | N(2)-C(3)-H(3B)  | 109.0      |
| C(4)-C(3)-H(3B) | 109.0      | H(3A)-C(3)-H(3B) | 107.8      |
| C(3)-C(4)-C(5)  | 116.86(14) | C(3)-C(4)-H(4A)  | 108.1      |
| C(5)-C(4)-H(4A) | 108.1      | C(3)-C(4)-H(4B)  | 108.1      |
| C(5)-C(4)-H(4B) | 108.1      | H(4A)-C(4)-H(4B) | 107.3      |
| C(6)-C(5)-C(20) | 111.20(14) | C(6)-C(5)-C(4)   | 112.59(15) |

**Table S3.** (continued).

---

|                    |            |                     |            |
|--------------------|------------|---------------------|------------|
| C(20)-C(5)-C(4)    | 107.78(14) | C(6)-C(5)-C(9)      | 109.31(14) |
| C(20)-C(5)-C(9)    | 109.93(14) | C(4)-C(5)-C(9)      | 105.88(14) |
| C(7)-C(6)-C(5)     | 115.36(16) | C(7)-C(6)-H(6A)     | 108.4      |
| C(5)-C(6)-H(6A)    | 108.4      | C(7)-C(6)-H(6B)     | 108.4      |
| C(5)-C(6)-H(6B)    | 108.4      | H(6A)-C(6)-H(6B)    | 107.5      |
| C(8)-C(7)-C(6)     | 113.16(16) | C(8)-C(7)-H(7A)     | 108.9      |
| C(6)-C(7)-H(7A)    | 108.9      | C(8)-C(7)-H(7B)     | 108.9      |
| C(6)-C(7)-H(7B)    | 108.9      | H(7A)-C(7)-H(7B)    | 107.8      |
| C(1)-C(8)-C(7)     | 114.57(15) | C(1)-C(8)-H(8A)     | 108.6      |
| C(7)-C(8)-H(8A)    | 108.6      | C(1)-C(8)-H(8B)     | 108.6      |
| C(7)-C(8)-H(8B)    | 108.6      | H(8A)-C(8)-H(8B)    | 107.6      |
| C(10)-C(9)-C(1)    | 109.63(14) | C(10)-C(9)-C(5)     | 114.83(15) |
| C(1)-C(9)-C(5)     | 108.96(14) | C(10)-C(9)-H(9A)    | 107.7      |
| C(1)-C(9)-H(9A)    | 107.7      | C(5)-C(9)-H(9A)     | 107.7      |
| C(11)-C(10)-C(9)   | 123.7(2)   | C(11)-C(10)-H(10)   | 118.2      |
| C(9)-C(10)-H(10)   | 118.2      | C(10)-C(11)-H(11A)  | 120.0      |
| C(10)-C(11)-H(11B) | 120.0      | H(11A)-C(11)-H(11B) | 120.0      |
| N(2)-C(12)-C(13)   | 112.29(15) | N(2)-C(12)-H(12A)   | 109.1      |
| C(13)-C(12)-H(12A) | 109.1      | N(2)-C(12)-H(12B)   | 109.1      |
| C(13)-C(12)-H(12B) | 109.1      | H(12A)-C(12)-H(12B) | 107.9      |
| C(14)-C(13)-C(12)  | 113.36(16) | C(14)-C(13)-H(13A)  | 108.9      |
| C(12)-C(13)-H(13A) | 108.9      | C(14)-C(13)-H(13B)  | 108.9      |
| C(12)-C(13)-H(13B) | 108.9      | H(13A)-C(13)-H(13B) | 107.7      |
| C(19)-C(14)-C(15)  | 117.9(2)   | C(19)-C(14)-C(13)   | 122.4(2)   |
| C(15)-C(14)-C(13)  | 119.6(2)   | C(16)-C(15)-C(14)   | 120.8(3)   |
| C(16)-C(15)-H(15)  | 119.6      | C(14)-C(15)-H(15)   | 119.6      |
| C(17)-C(16)-C(15)  | 120.4(3)   | C(17)-C(16)-H(16)   | 119.8      |
| C(15)-C(16)-H(16)  | 119.8      | C(16)-C(17)-C(18)   | 119.9(2)   |
| C(16)-C(17)-H(17)  | 120.1      | C(18)-C(17)-H(17)   | 120.1      |
| C(17)-C(18)-C(19)  | 119.8(3)   | C(17)-C(18)-H(18)   | 120.1      |
| C(19)-C(18)-H(18)  | 120.1      | C(14)-C(19)-C(18)   | 121.1(2)   |
| C(14)-C(19)-H(19)  | 119.4      | C(18)-C(19)-H(19)   | 119.4      |
| C(25)-C(20)-C(21)  | 117.51(17) | C(25)-C(20)-C(5)    | 122.45(16) |
| C(21)-C(20)-C(5)   | 120.04(16) | C(22)-C(21)-C(20)   | 120.40(19) |
| C(22)-C(21)-H(21)  | 119.8      | C(20)-C(21)-H(21)   | 119.8      |
| C(23)-C(22)-C(21)  | 121.67(19) | C(23)-C(22)-H(22)   | 119.2      |
| C(21)-C(22)-H(22)  | 119.2      | C(24)-C(23)-C(22)   | 118.31(18) |
| C(24)-C(23)-H(23)  | 120.8      | C(22)-C(23)-H(23)   | 120.8      |
| C(24)-O(24)-H(24)  | 109(4)     | O(24)-C(24)-C(23)   | 122.24(18) |
| O(24)-C(24)-C(25)  | 117.30(19) | C(23)-C(24)-C(25)   | 120.43(19) |
| C(20)-C(25)-C(24)  | 121.65(19) | C(20)-C(25)-H(25)   | 119.2      |
| C(24)-C(25)-H(25)  | 119.2      |                     |            |

---





**Table S4.** Anisotropic displacement parameters ( $\text{\AA}^2 \times 10^3$ ) for DC-01-00-76.1. The anisotropic displacement factor exponent takes the form:  $-2\pi^2[h^2a^{*2}U^{11} + \dots + 2hka^*b^*U^{12}]$

|        | U <sup>11</sup> | U <sup>22</sup> | U <sup>33</sup> | U <sup>23</sup> | U <sup>13</sup> | U <sup>12</sup> |
|--------|-----------------|-----------------|-----------------|-----------------|-----------------|-----------------|
| C(1)   | 31(1)           | 40(1)           | 31(1)           | 4(1)            | 2(1)            | 2(1)            |
| N(2)   | 34(1)           | 35(1)           | 33(1)           | 4(1)            | -2(1)           | 0(1)            |
| C(3)   | 37(1)           | 46(1)           | 31(1)           | 4(1)            | 4(1)            | 1(1)            |
| C(4)   | 33(1)           | 46(1)           | 38(1)           | 3(1)            | 4(1)            | 1(1)            |
| C(5)   | 32(1)           | 30(1)           | 35(1)           | 0(1)            | -1(1)           | 1(1)            |
| C(6)   | 41(1)           | 31(1)           | 49(1)           | -3(1)           | -6(1)           | 0(1)            |
| C(7)   | 48(1)           | 33(1)           | 53(1)           | 1(1)            | -10(1)          | -10(1)          |
| C(8)   | 35(1)           | 45(1)           | 50(1)           | 11(1)           | -5(1)           | -10(1)          |
| C(9)   | 33(1)           | 32(1)           | 33(1)           | 1(1)            | -1(1)           | 0(1)            |
| C(10)  | 41(1)           | 59(1)           | 34(1)           | 6(1)            | 0(1)            | 4(1)            |
| C(11)  | 85(2)           | 95(2)           | 38(1)           | -11(1)          | 7(1)            | -3(2)           |
| C(12)  | 37(1)           | 47(1)           | 35(1)           | 4(1)            | -6(1)           | 2(1)            |
| C(13)  | 40(1)           | 64(1)           | 42(1)           | 1(1)            | -1(1)           | 5(1)            |
| C(14)  | 35(1)           | 49(1)           | 49(1)           | 11(1)           | 2(1)            | 0(1)            |
| C(15)  | 50(1)           | 53(1)           | 75(2)           | 4(1)            | 4(1)            | 1(1)            |
| C(16)  | 47(1)           | 56(2)           | 105(2)          | 15(2)           | 5(1)            | 13(1)           |
| C(17)  | 37(1)           | 83(2)           | 79(2)           | 30(2)           | -5(1)           | 3(1)            |
| C(18)  | 42(1)           | 84(2)           | 52(1)           | 15(1)           | -3(1)           | -8(1)           |
| C(19)  | 40(1)           | 61(2)           | 48(1)           | 8(1)            | -2(1)           | 1(1)            |
| C(20)  | 32(1)           | 32(1)           | 38(1)           | -2(1)           | 1(1)            | 0(1)            |
| C(21)  | 39(1)           | 31(1)           | 53(1)           | -2(1)           | -2(1)           | 2(1)            |
| C(22)  | 41(1)           | 36(1)           | 62(1)           | -10(1)          | -3(1)           | -6(1)           |
| C(23)  | 32(1)           | 46(1)           | 52(1)           | -10(1)          | -6(1)           | -1(1)           |
| O(24)  | 72(1)           | 42(1)           | 118(2)          | 8(1)            | -52(1)          | 3(1)            |
| C(24)  | 41(1)           | 38(1)           | 60(1)           | 1(1)            | -11(1)          | 2(1)            |
| C(25)  | 43(1)           | 32(1)           | 60(1)           | 0(1)            | -13(1)          | -2(1)           |
| Cl(26) | 70(1)           | 42(1)           | 69(1)           | 5(1)            | -23(1)          | 0(1)            |

**Table S5.** Hydrogen coordinates ( $\times 10^4$ ) and isotropic displacement parameters ( $\text{\AA}^2 \times 10^3$ ) for DC-01-00-76.1.

|        | x         | y        | z        | U(eq) |
|--------|-----------|----------|----------|-------|
| H(1)   | 5595      | 4848     | 6609     | 41    |
| H(2)   | 4440(30)  | 3950(30) | 8250(30) | 52(7) |
| H(3A)  | 3662      | 5762     | 9798     | 45    |
| H(3B)  | 3156      | 4577     | 10109    | 45    |
| H(4A)  | 1301      | 5715     | 8975     | 47    |
| H(4B)  | 1481      | 4572     | 8296     | 47    |
| H(6A)  | 2637      | 7282     | 6118     | 49    |
| H(6B)  | 1902      | 7374     | 7597     | 49    |
| H(7A)  | 4465      | 7910     | 7604     | 54    |
| H(7B)  | 4078      | 7098     | 8815     | 54    |
| H(8A)  | 5680      | 6654     | 6377     | 52    |
| H(8B)  | 6177      | 6423     | 7961     | 52    |
| H(9A)  | 3076      | 4367     | 6249     | 39    |
| H(10)  | 3727      | 6162     | 4487     | 54    |
| H(11A) | 3608      | 4009     | 3875     | 87    |
| H(11B) | 3864      | 4976     | 2763     | 87    |
| H(12A) | 5813      | 4136     | 10280    | 48    |
| H(12B) | 6239      | 5313     | 9832     | 48    |
| H(13A) | 7009      | 3536     | 8133     | 59    |
| H(13B) | 7667      | 4704     | 8047     | 59    |
| H(15)  | 9167      | 2507     | 8576     | 71    |
| H(16)  | 11211     | 2034     | 9981     | 84    |
| H(17)  | 11873     | 3034     | 11954    | 80    |
| H(18)  | 10511     | 4541     | 12527    | 71    |
| H(19)  | 8463      | 5023     | 11126    | 60    |
| H(21)  | 548       | 4048     | 6218     | 50    |
| H(22)  | -1664     | 3862     | 4952     | 55    |
| H(23)  | -2894     | 5347     | 3996     | 52    |
| H(24)  | -2870(50) | 7190(50) | 3730(50) | 118   |
| H(25)  | 267       | 7253     | 5741     | 54    |

**Table S6.** Torsion angles [°] for DC-01-00-76.1.

|                         |             |                         |             |
|-------------------------|-------------|-------------------------|-------------|
| C(8)-C(1)-N(2)-C(12)    | -59.4(2)    | C(9)-C(1)-N(2)-C(12)    | 174.85(15)  |
| C(8)-C(1)-N(2)-C(3)     | 67.78(19)   | C(9)-C(1)-N(2)-C(3)     | -58.00(19)  |
| C(12)-N(2)-C(3)-C(4)    | 174.93(16)  | C(1)-N(2)-C(3)-C(4)     | 45.1(2)     |
| N(2)-C(3)-C(4)-C(5)     | -42.6(2)    | C(3)-C(4)-C(5)-C(6)     | -68.7(2)    |
| C(3)-C(4)-C(5)-C(20)    | 168.27(16)  | C(3)-C(4)-C(5)-C(9)     | 50.7(2)     |
| C(20)-C(5)-C(6)-C(7)    | -175.21(15) | C(4)-C(5)-C(6)-C(7)     | 63.7(2)     |
| C(9)-C(5)-C(6)-C(7)     | -53.6(2)    | C(5)-C(6)-C(7)-C(8)     | 44.8(2)     |
| N(2)-C(1)-C(8)-C(7)     | -72.7(2)    | C(9)-C(1)-C(8)-C(7)     | 50.3(2)     |
| C(6)-C(7)-C(8)-C(1)     | -42.0(2)    | N(2)-C(1)-C(9)-C(10)    | -165.60(16) |
| C(8)-C(1)-C(9)-C(10)    | 68.0(2)     | N(2)-C(1)-C(9)-C(5)     | 67.96(18)   |
| C(8)-C(1)-C(9)-C(5)     | -58.42(18)  | C(6)-C(5)-C(9)-C(10)    | -64.6(2)    |
| C(20)-C(5)-C(9)-C(10)   | 57.8(2)     | C(4)-C(5)-C(9)-C(10)    | 173.91(16)  |
| C(6)-C(5)-C(9)-C(1)     | 58.83(18)   | C(20)-C(5)-C(9)-C(1)    | -178.85(14) |
| C(4)-C(5)-C(9)-C(1)     | -62.69(18)  | C(1)-C(9)-C(10)-C(11)   | 104.9(3)    |
| C(5)-C(9)-C(10)-C(11)   | -132.1(2)   | C(3)-N(2)-C(12)-C(13)   | 179.31(17)  |
| C(1)-N(2)-C(12)-C(13)   | -51.5(2)    | N(2)-C(12)-C(13)-C(14)  | -165.59(18) |
| C(12)-C(13)-C(14)-C(19) | -39.9(3)    | C(12)-C(13)-C(14)-C(15) | 143.2(2)    |
| C(19)-C(14)-C(15)-C(16) | -0.8(3)     | C(13)-C(14)-C(15)-C(16) | 176.3(2)    |
| C(14)-C(15)-C(16)-C(17) | 0.6(4)      | C(15)-C(16)-C(17)-C(18) | -0.4(4)     |
| C(16)-C(17)-C(18)-C(19) | 0.3(4)      | C(15)-C(14)-C(19)-C(18) | 0.7(3)      |
| C(13)-C(14)-C(19)-C(18) | -176.3(2)   | C(17)-C(18)-C(19)-C(14) | -0.5(3)     |
| C(6)-C(5)-C(20)-C(25)   | -1.8(2)     | C(4)-C(5)-C(20)-C(25)   | 122.07(19)  |
| C(9)-C(5)-C(20)-C(25)   | -122.97(18) | C(6)-C(5)-C(20)-C(21)   | 178.40(17)  |
| C(4)-C(5)-C(20)-C(21)   | -57.7(2)    | C(9)-C(5)-C(20)-C(21)   | 57.2(2)     |
| C(25)-C(20)-C(21)-C(22) | 0.5(3)      | C(5)-C(20)-C(21)-C(22)  | -179.67(17) |
| C(20)-C(21)-C(22)-C(23) | 1.0(3)      | C(21)-C(22)-C(23)-C(24) | -1.7(3)     |
| C(22)-C(23)-C(24)-O(24) | -177.2(2)   | C(22)-C(23)-C(24)-C(25) | 0.9(3)      |
| C(21)-C(20)-C(25)-C(24) | -1.3(3)     | C(5)-C(20)-C(25)-C(24)  | 178.89(18)  |
| O(24)-C(24)-C(25)-C(20) | 178.8(2)    | C(23)-C(24)-C(25)-C(20) | 0.6(3)      |

**Table S7.** Hydrogen bonds for DC-01-00-76.1 [ $\text{\AA}$  and  $^\circ$ ].

| D-H...A                 | d(D-H)  | d(H...A) | d(D...A)   | $\angle(\text{DHA})$ |
|-------------------------|---------|----------|------------|----------------------|
| N(2)-H(2)...Cl(26)#1    | 0.93(3) | 2.20(3)  | 3.0954(19) | 163(2)               |
| C(12)-H(12B)...Cl(26)#2 | 0.97    | 2.98     | 3.860(2)   | 151.9                |
| C(13)-H(13A)...Cl(26)#1 | 0.97    | 2.98     | 3.691(3)   | 130.8                |
| O(24)-H(24)...Cl(26)#3  | 0.88(4) | 2.22(4)  | 3.0638(19) | 159(4)               |

Symmetry transformations used to generate equivalent atoms:

#1  $-x+1, y-1/2, -z+1$  #2  $x, y, z+1$  #3  $x-1, y, z$

**Table S1.** Crystal data and structure refinement for Compound **20**.

|                                   |                                                   |                  |
|-----------------------------------|---------------------------------------------------|------------------|
| Identification code               | knih136                                           |                  |
| Empirical formula                 | C <sub>25</sub> H <sub>32</sub> ClNO              |                  |
| Formula weight                    | 397.96                                            |                  |
| Temperature                       | 293(2) K                                          |                  |
| Wavelength                        | 1.54178 Å                                         |                  |
| Crystal system                    | Monoclinic                                        |                  |
| Space group                       | P2 <sub>1</sub>                                   |                  |
| Unit cell dimensions              | a = 10.847(2) Å                                   | ∠ = 90°.         |
|                                   | b = 7.4852(15) Å                                  | ∠ = 107.022(7)°. |
|                                   | c = 13.670(2) Å                                   | ∠ = 90°.         |
| Volume                            | 1061.3(4) Å <sup>3</sup>                          |                  |
| Z                                 | 2                                                 |                  |
| Density (calculated)              | 1.245 Mg/m <sup>3</sup>                           |                  |
| Absorption coefficient            | 1.693 mm <sup>-1</sup>                            |                  |
| F(000)                            | 428                                               |                  |
| Crystal size                      | 0.174 x 0.063 x 0.060 mm <sup>3</sup>             |                  |
| Theta range for data collection   | 3.381 to 74.381°.                                 |                  |
| Index ranges                      | -13 ≤ h ≤ 13, -9 ≤ k ≤ 9, -17 ≤ l ≤ 16            |                  |
| Reflections collected             | 18404                                             |                  |
| Independent reflections           | 4315 [R <sub>int</sub> = 0.0263]                  |                  |
| Completeness to theta = 67.679°   | 99.9 %                                            |                  |
| Absorption correction             | Semi-empirical from equivalents                   |                  |
| Max. and min. transmission        | 0.7538 and 0.6568                                 |                  |
| Refinement method                 | Full-matrix least-squares on F <sup>2</sup>       |                  |
| Data / restraints / parameters    | 4315 / 1 / 261                                    |                  |
| Goodness-of-fit on F <sup>2</sup> | 1.010                                             |                  |
| Final R indices [I > 2σ(I)]       | R <sub>1</sub> = 0.0273, wR <sub>2</sub> = 0.0709 |                  |
| R indices (all data)              | R <sub>1</sub> = 0.0294, wR <sub>2</sub> = 0.0727 |                  |
| Absolute structure parameter      | 0.040(5)                                          |                  |
| Largest diff. peak and hole       | 0.243 and -0.183 e.Å <sup>-3</sup>                |                  |

**Table S2.** Atomic coordinates ( $\times 10^4$ ) and equivalent isotropic displacement parameters ( $\text{\AA}^2 \times 10^3$ ) for DC-01-0155. U(eq) is defined as one third of the trace of the orthogonalized  $U^{ij}$  tensor.

|        | x        | y       | z       | U(eq) |
|--------|----------|---------|---------|-------|
| C(1)   | 5486(2)  | 6025(2) | 2802(1) | 28(1) |
| N(2)   | 6355(2)  | 5356(2) | 2187(1) | 29(1) |
| C(3)   | 5693(2)  | 5323(3) | 1056(1) | 37(1) |
| C(4)   | 4381(2)  | 4412(3) | 799(1)  | 36(1) |
| C(5)   | 3499(2)  | 5001(3) | 1445(1) | 29(1) |
| C(7)   | 4105(2)  | 8390(3) | 1579(2) | 43(1) |
| C(6)   | 3049(2)  | 6969(3) | 1236(2) | 39(1) |
| C(8)   | 5097(2)  | 7983(3) | 2611(2) | 37(1) |
| C(9)   | 4279(2)  | 4843(2) | 2596(1) | 27(1) |
| C(10)  | 4590(2)  | 2959(3) | 2981(1) | 31(1) |
| C(11)  | 4280(2)  | 2233(3) | 3757(2) | 43(1) |
| C(12)  | 3530(3)  | 3051(4) | 4396(2) | 63(1) |
| C(13)  | 2300(2)  | 3804(3) | 1234(1) | 33(1) |
| C(14)  | 1522(2)  | 3925(3) | 1882(2) | 38(1) |
| C(15)  | 457(2)   | 2822(3) | 1763(2) | 42(1) |
| O(16)  | -211(2)  | 3011(3) | 2462(2) | 68(1) |
| C(17)  | 132(2)   | 1589(3) | 975(2)  | 50(1) |
| C(18)  | 874(2)   | 1502(4) | 309(2)  | 58(1) |
| C(19)  | 1948(2)  | 2590(3) | 434(2)  | 48(1) |
| C(20)  | 7629(2)  | 6326(3) | 2406(1) | 34(1) |
| C(21)  | 8378(2)  | 6283(4) | 3527(2) | 49(1) |
| C(22)  | 9760(2)  | 6927(3) | 3782(2) | 39(1) |
| C(23)  | 10193(2) | 8073(4) | 3159(2) | 49(1) |
| C(24)  | 11467(2) | 8668(4) | 3452(2) | 56(1) |
| C(25)  | 12301(2) | 8122(4) | 4359(2) | 56(1) |
| C(26)  | 11881(2) | 6994(4) | 4990(2) | 57(1) |
| C(27)  | 10619(2) | 6399(4) | 4701(2) | 50(1) |
| Cl(28) | -2869(1) | 1341(1) | 1922(1) | 46(1) |

**Table S3.** Bond lengths [Å] and angles [°] for DC-01-0155.

|                 |            |                  |            |
|-----------------|------------|------------------|------------|
| C(1)-N(2)       | 1.520(2)   | C(1)-C(8)        | 1.527(3)   |
| C(1)-C(9)       | 1.536(2)   | C(1)-H(1)        | 0.9800     |
| N(2)-C(3)       | 1.503(2)   | N(2)-C(20)       | 1.512(2)   |
| N(2)-H(2)       | 0.88(3)    | C(3)-C(4)        | 1.523(3)   |
| C(3)-H(3A)      | 0.9700     | C(3)-H(3B)       | 0.9700     |
| C(4)-C(5)       | 1.545(3)   | C(4)-H(4A)       | 0.9700     |
| C(4)-H(4B)      | 0.9700     | C(5)-C(13)       | 1.535(3)   |
| C(5)-C(6)       | 1.552(3)   | C(5)-C(9)        | 1.557(2)   |
| C(7)-C(6)       | 1.532(3)   | C(7)-C(8)        | 1.533(3)   |
| C(7)-H(7A)      | 0.9700     | C(7)-H(7B)       | 0.9700     |
| C(6)-H(6A)      | 0.9700     | C(6)-H(6B)       | 0.9700     |
| C(8)-H(8A)      | 0.9700     | C(8)-H(8B)       | 0.9700     |
| C(9)-C(10)      | 1.508(3)   | C(9)-H(9)        | 0.9800     |
| C(10)-C(11)     | 1.320(3)   | C(10)-H(10)      | 0.9300     |
| C(11)-C(12)     | 1.488(4)   | C(11)-H(11)      | 0.9300     |
| C(12)-H(12A)    | 0.9600     | C(12)-H(12B)     | 0.9600     |
| C(12)-H(12C)    | 0.9600     | C(13)-C(19)      | 1.387(3)   |
| C(13)-C(14)     | 1.394(3)   | C(15)-O(16)      | 1.365(3)   |
| C(15)-C(17)     | 1.384(3)   | C(15)-C(14)      | 1.390(3)   |
| O(16)-H(16)     | 0.89(4)    | C(17)-C(18)      | 1.382(4)   |
| C(17)-H(17)     | 0.9300     | C(18)-C(19)      | 1.390(3)   |
| C(18)-H(18)     | 0.9300     | C(19)-H(19)      | 0.9300     |
| C(20)-C(21)     | 1.510(3)   | C(20)-H(20A)     | 0.9700     |
| C(20)-H(20B)    | 0.9700     | C(21)-C(22)      | 1.515(3)   |
| C(21)-H(21A)    | 0.9700     | C(21)-H(21B)     | 0.9700     |
| C(22)-C(23)     | 1.384(3)   | C(22)-C(27)      | 1.385(3)   |
| C(23)-C(24)     | 1.395(3)   | C(23)-H(23)      | 0.9300     |
| C(24)-C(25)     | 1.366(4)   | C(24)-H(24)      | 0.9300     |
| C(25)-C(26)     | 1.377(4)   | C(25)-H(25)      | 0.9300     |
| C(26)-C(27)     | 1.383(3)   | C(26)-H(26)      | 0.9300     |
| C(27)-H(27)     | 0.9300     | C(14)-H(14)      | 0.9300     |
|                 |            |                  |            |
| N(2)-C(1)-C(8)  | 113.99(14) | N(2)-C(1)-C(9)   | 110.04(13) |
| C(8)-C(1)-C(9)  | 110.13(15) | N(2)-C(1)-H(1)   | 107.5      |
| C(8)-C(1)-H(1)  | 107.5      | C(9)-C(1)-H(1)   | 107.5      |
| C(3)-N(2)-C(20) | 110.24(14) | C(3)-N(2)-C(1)   | 112.76(14) |
| C(20)-N(2)-C(1) | 114.33(14) | C(3)-N(2)-H(2)   | 103.5(15)  |
| C(20)-N(2)-H(2) | 104.6(16)  | C(1)-N(2)-H(2)   | 110.5(15)  |
| N(2)-C(3)-C(4)  | 112.21(15) | N(2)-C(3)-H(3A)  | 109.2      |
| C(4)-C(3)-H(3A) | 109.2      | N(2)-C(3)-H(3B)  | 109.2      |
| C(4)-C(3)-H(3B) | 109.2      | H(3A)-C(3)-H(3B) | 107.9      |
| C(3)-C(4)-C(5)  | 115.70(16) | C(3)-C(4)-H(4A)  | 108.4      |
| C(5)-C(4)-H(4A) | 108.4      | C(3)-C(4)-H(4B)  | 108.4      |
| C(5)-C(4)-H(4B) | 108.4      | H(4A)-C(4)-H(4B) | 107.4      |

**Table S3.** (continued).

|                     |            |                     |            |
|---------------------|------------|---------------------|------------|
| C(13)-C(5)-C(4)     | 111.01(15) | C(13)-C(5)-C(6)     | 108.44(15) |
| C(4)-C(5)-C(6)      | 112.28(16) | C(13)-C(5)-C(9)     | 109.00(14) |
| C(4)-C(5)-C(9)      | 108.15(15) | C(6)-C(5)-C(9)      | 107.86(14) |
| C(6)-C(7)-C(8)      | 113.81(16) | C(6)-C(7)-H(7A)     | 108.8      |
| C(8)-C(7)-H(7A)     | 108.8      | C(6)-C(7)-H(7B)     | 108.8      |
| C(8)-C(7)-H(7B)     | 108.8      | H(7A)-C(7)-H(7B)    | 107.7      |
| C(7)-C(6)-C(5)      | 115.88(17) | C(7)-C(6)-H(6A)     | 108.3      |
| C(5)-C(6)-H(6A)     | 108.3      | C(7)-C(6)-H(6B)     | 108.3      |
| C(5)-C(6)-H(6B)     | 108.3      | H(6A)-C(6)-H(6B)    | 107.4      |
| C(1)-C(8)-C(7)      | 115.61(15) | C(1)-C(8)-H(8A)     | 108.4      |
| C(7)-C(8)-H(8A)     | 108.4      | C(1)-C(8)-H(8B)     | 108.4      |
| C(7)-C(8)-H(8B)     | 108.4      | H(8A)-C(8)-H(8B)    | 107.4      |
| C(10)-C(9)-C(1)     | 112.52(15) | C(10)-C(9)-C(5)     | 115.05(14) |
| C(1)-C(9)-C(5)      | 108.86(14) | C(10)-C(9)-H(9)     | 106.6      |
| C(1)-C(9)-H(9)      | 106.6      | C(5)-C(9)-H(9)      | 106.6      |
| C(11)-C(10)-C(9)    | 125.53(18) | C(11)-C(10)-H(10)   | 117.2      |
| C(9)-C(10)-H(10)    | 117.2      | C(10)-C(11)-C(12)   | 127.9(2)   |
| C(10)-C(11)-H(11)   | 116.0      | C(12)-C(11)-H(11)   | 116.0      |
| C(11)-C(12)-H(12A)  | 109.5      | C(11)-C(12)-H(12B)  | 109.5      |
| H(12A)-C(12)-H(12B) | 109.5      | C(11)-C(12)-H(12C)  | 109.5      |
| H(12A)-C(12)-H(12C) | 109.5      | H(12B)-C(12)-H(12C) | 109.5      |
| C(19)-C(13)-C(14)   | 117.74(19) | C(19)-C(13)-C(5)    | 123.57(18) |
| C(14)-C(13)-C(5)    | 118.69(17) | O(16)-C(15)-C(17)   | 123.3(2)   |
| O(16)-C(15)-C(14)   | 116.7(2)   | C(17)-C(15)-C(14)   | 120.0(2)   |
| C(15)-O(16)-H(16)   | 108(3)     | C(18)-C(17)-C(15)   | 118.7(2)   |
| C(18)-C(17)-H(17)   | 120.7      | C(15)-C(17)-H(17)   | 120.7      |
| C(17)-C(18)-C(19)   | 121.3(2)   | C(17)-C(18)-H(18)   | 119.3      |
| C(19)-C(18)-H(18)   | 119.3      | C(13)-C(19)-C(18)   | 120.5(2)   |
| C(13)-C(19)-H(19)   | 119.7      | C(18)-C(19)-H(19)   | 119.7      |
| C(21)-C(20)-N(2)    | 112.30(15) | C(21)-C(20)-H(20A)  | 109.1      |
| N(2)-C(20)-H(20A)   | 109.1      | C(21)-C(20)-H(20B)  | 109.1      |
| N(2)-C(20)-H(20B)   | 109.1      | H(20A)-C(20)-H(20B) | 107.9      |
| C(20)-C(21)-C(22)   | 115.38(17) | C(20)-C(21)-H(21A)  | 108.4      |
| C(22)-C(21)-H(21A)  | 108.4      | C(20)-C(21)-H(21B)  | 108.4      |
| C(22)-C(21)-H(21B)  | 108.4      | H(21A)-C(21)-H(21B) | 107.5      |
| C(23)-C(22)-C(27)   | 118.4(2)   | C(23)-C(22)-C(21)   | 123.2(2)   |
| C(27)-C(22)-C(21)   | 118.4(2)   | C(22)-C(23)-C(24)   | 120.5(2)   |
| C(22)-C(23)-H(23)   | 119.7      | C(24)-C(23)-H(23)   | 119.7      |
| C(25)-C(24)-C(23)   | 120.1(2)   | C(25)-C(24)-H(24)   | 119.9      |
| C(23)-C(24)-H(24)   | 119.9      | C(24)-C(25)-C(26)   | 120.0(2)   |
| C(24)-C(25)-H(25)   | 120.0      | C(26)-C(25)-H(25)   | 120.       |
| C(25)-C(26)-C(27)   | 120.0(2)   | C(25)-C(26)-H(26)   | 120.0      |
| C(27)-C(26)-H(26)   | 120.0      | C(26)-C(27)-C(22)   | 120.9(2)   |



|                   |            |                   |       |
|-------------------|------------|-------------------|-------|
| C(26)-C(27)-H(27) | 119.5      | C(22)-C(27)-H(27) | 119.5 |
| C(15)-C(14)-C(13) | 121.66(19) | C(15)-C(14)-H(14) | 119.2 |
| C(13)-C(14)-H(14) | 119.2      |                   |       |

---

**Table S4.** Anisotropic displacement parameters ( $\text{\AA}^2 \times 10^3$ ) for DC-01-0155. The anisotropic displacement factor exponent takes the form:  $-2\pi^2[h^2a^{*2}U^{11} + \dots + 2hkab^*U^{12}]$

|        | U <sup>11</sup> | U <sup>22</sup> | U <sup>33</sup> | U <sup>23</sup> | U <sup>13</sup> | U <sup>12</sup> |
|--------|-----------------|-----------------|-----------------|-----------------|-----------------|-----------------|
| C(1)   | 29(1)           | 31(1)           | 27(1)           | -3(1)           | 10(1)           | -6(1)           |
| N(2)   | 29(1)           | 29(1)           | 31(1)           | 0(1)            | 11(1)           | -4(1)           |
| C(3)   | 39(1)           | 46(1)           | 29(1)           | -2(1)           | 14(1)           | -5(1)           |
| C(4)   | 37(1)           | 43(1)           | 27(1)           | -5(1)           | 9(1)            | -4(1)           |
| C(5)   | 27(1)           | 30(1)           | 28(1)           | -1(1)           | 5(1)            | -2(1)           |
| C(7)   | 47(1)           | 27(1)           | 56(1)           | 6(1)            | 15(1)           | -1(1)           |
| C(6)   | 37(1)           | 34(1)           | 42(1)           | 5(1)            | 5(1)            | 1(1)            |
| C(8)   | 37(1)           | 28(1)           | 46(1)           | -7(1)           | 14(1)           | -5(1)           |
| C(9)   | 27(1)           | 27(1)           | 28(1)           | -1(1)           | 10(1)           | -4(1)           |
| C(10)  | 29(1)           | 30(1)           | 36(1)           | -1(1)           | 10(1)           | -1(1)           |
| C(11)  | 50(1)           | 35(1)           | 42(1)           | 6(1)            | 12(1)           | -3(1)           |
| C(12)  | 95(2)           | 58(2)           | 48(1)           | 7(1)            | 39(1)           | 0(2)            |
| C(13)  | 28(1)           | 31(1)           | 35(1)           | 0(1)            | 2(1)            | -1(1)           |
| C(15)  | 28(1)           | 41(1)           | 56(1)           | 1(1)            | 9(1)            | -2(1)           |
| O(16)  | 47(1)           | 74(1)           | 91(1)           | -22(1)          | 35(1)           | -25(1)          |
| C(17)  | 34(1)           | 42(1)           | 66(1)           | -1(1)           | 2(1)            | -12(1)          |
| C(18)  | 50(1)           | 56(1)           | 61(1)           | -25(1)          | 6(1)            | -16(1)          |
| C(19)  | 43(1)           | 53(1)           | 46(1)           | -15(1)          | 9(1)            | -11(1)          |
| C(20)  | 30(1)           | 35(1)           | 40(1)           | -1(1)           | 14(1)           | -7(1)           |
| C(21)  | 37(1)           | 69(1)           | 41(1)           | 4(1)            | 10(1)           | -18(1)          |
| C(22)  | 34(1)           | 41(1)           | 43(1)           | -3(1)           | 10(1)           | -7(1)           |
| C(23)  | 39(1)           | 56(1)           | 51(1)           | 4(1)            | 9(1)            | -12(1)          |
| C(24)  | 43(1)           | 59(2)           | 69(2)           | -1(1)           | 19(1)           | -15(1)          |
| C(25)  | 34(1)           | 58(1)           | 73(2)           | -14(1)          | 11(1)           | -9(1)           |
| C(26)  | 42(1)           | 61(2)           | 58(1)           | -5(1)           | -2(1)           | 2(1)            |
| C(27)  | 45(1)           | 50(1)           | 51(1)           | 3(1)            | 8(1)            | -4(1)           |
| Cl(28) | 38(1)           | 36(1)           | 71(1)           | -3(1)           | 25(1)           | -4(1)           |
| C(14)  | 30(1)           | 36(1)           | 47(1)           | -5(1)           | 8(1)            | -4(1)           |

**Table S5.** Hydrogen coordinates ( $\times 10^4$ ) and isotropic displacement parameters ( $\text{\AA}^2 \times 10^3$ ) for DC-01-0155.

|        | x        | y        | z        | U(eq)  |
|--------|----------|----------|----------|--------|
| H(1)   | 5962     | 5902     | 3528     | 34     |
| H(2)   | 6570(20) | 4230(40) | 2334(18) | 35     |
| H(3A)  | 6233     | 4697     | 715      | 44     |
| H(3B)  | 5582     | 6539     | 799      | 44     |
| H(4A)  | 4517     | 3133     | 880      | 43     |
| H(4B)  | 3932     | 4635     | 84       | 43     |
| H(7A)  | 3704     | 9532     | 1625     | 52     |
| H(7B)  | 4551     | 8498     | 1061     | 52     |
| H(6A)  | 2643     | 7108     | 507      | 47     |
| H(6B)  | 2397     | 7200     | 1577     | 47     |
| H(8A)  | 5867     | 8680     | 2660     | 44     |
| H(8B)  | 4750     | 8383     | 3151     | 44     |
| H(9)   | 3740     | 5358     | 2987     | 33     |
| H(10)  | 5039     | 2248     | 2643     | 38     |
| H(11)  | 4564     | 1070     | 3924     | 51     |
| H(12A) | 3487     | 4321     | 4294     | 95     |
| H(12B) | 3945     | 2792     | 5104     | 95     |
| H(12C) | 2673     | 2565     | 4201     | 95     |
| H(16)  | -920(40) | 2350(60) | 2260(30) | 90(12) |
| H(17)  | -571     | 833      | 895      | 60     |
| H(18)  | 650      | 701      | -235     | 69     |
| H(19)  | 2435     | 2502     | -22      | 57     |
| H(20A) | 8143     | 5780     | 2013     | 41     |
| H(20B) | 7472     | 7559     | 2187     | 41     |
| H(21A) | 8381     | 5065     | 3771     | 59     |
| H(21B) | 7927     | 7012     | 3899     | 59     |
| H(23)  | 9629     | 8450     | 2540     | 59     |
| H(24)  | 11750    | 9438     | 3028     | 67     |
| H(25)  | 13153    | 8512     | 4550     | 67     |
| H(26)  | 12446    | 6631     | 5610     | 69     |
| H(27)  | 10343    | 5633     | 5130     | 60     |
| H(14)  | 1720     | 4764     | 2406     | 46     |

**Table S6.** Torsion angles [°] for DC-01-0155.

|                         |             |                         |             |
|-------------------------|-------------|-------------------------|-------------|
| C(8)-C(1)-N(2)-C(3)     | -66.02(19)  | C(9)-C(1)-N(2)-C(3)     | 58.26(19)   |
| C(8)-C(1)-N(2)-C(20)    | 60.9(2)     | C(9)-C(1)-N(2)-C(20)    | -174.77(15) |
| C(20)-N(2)-C(3)-C(4)    | -178.09(17) | C(1)-N(2)-C(3)-C(4)     | -49.0(2)    |
| N(2)-C(3)-C(4)-C(5)     | 47.1(2)     | C(3)-C(4)-C(5)-C(13)    | -171.38(17) |
| C(3)-C(4)-C(5)-C(6)     | 67.0(2)     | C(3)-C(4)-C(5)-C(9)     | -51.8(2)    |
| C(8)-C(7)-C(6)-C(5)     | -39.8(3)    | C(13)-C(5)-C(6)-C(7)    | 169.96(17)  |
| C(4)-C(5)-C(6)-C(7)     | -67.0(2)    | C(9)-C(5)-C(6)-C(7)     | 52.1(2)     |
| N(2)-C(1)-C(8)-C(7)     | 73.3(2)     | C(9)-C(1)-C(8)-C(7)     | -50.9(2)    |
| C(6)-C(7)-C(8)-C(1)     | 38.6(3)     | N(2)-C(1)-C(9)-C(10)    | 65.64(18)   |
| C(8)-C(1)-C(9)-C(10)    | -167.87(14) | N(2)-C(1)-C(9)-C(5)     | -63.10(18)  |
| C(8)-C(1)-C(9)-C(5)     | 63.38(18)   | C(13)-C(5)-C(9)-C(10)   | 52.0(2)     |
| C(4)-C(5)-C(9)-C(10)    | -68.76(19)  | C(6)-C(5)-C(9)-C(10)    | 169.58(16)  |
| C(13)-C(5)-C(9)-C(1)    | 179.36(15)  | C(4)-C(5)-C(9)-C(1)     | 58.57(19)   |
| C(6)-C(5)-C(9)-C(1)     | -63.10(18)  | C(1)-C(9)-C(10)-C(11)   | 111.2(2)    |
| C(5)-C(9)-C(10)-C(11)   | -123.4(2)   | C(9)-C(10)-C(11)-C(12)  | 2.4(4)      |
| C(4)-C(5)-C(13)-C(19)   | -11.2(3)    | C(6)-C(5)-C(13)-C(19)   | 112.6(2)    |
| C(9)-C(5)-C(13)-C(19)   | -130.3(2)   | C(4)-C(5)-C(13)-C(14)   | 168.24(17)  |
| C(6)-C(5)-C(13)-C(14)   | -68.0(2)    | C(9)-C(5)-C(13)-C(14)   | 49.2(2)     |
| O(16)-C(15)-C(17)-C(18) | -179.9(2)   | C(14)-C(15)-C(17)-C(18) | -0.9(3)     |
| C(15)-C(17)-C(18)-C(19) | 1.7(4)      | C(14)-C(13)-C(19)-C(18) | -1.8(3)     |
| C(5)-C(13)-C(19)-C(18)  | 177.7(2)    | C(17)-C(18)-C(19)-C(13) | -0.4(4)     |
| C(3)-N(2)-C(20)-C(21)   | -175.9(2)   | C(1)-N(2)-C(20)-C(21)   | 55.8(2)     |
| N(2)-C(20)-C(21)-C(22)  | 169.4(2)    | C(20)-C(21)-C(22)-C(23) | 23.5(4)     |
| C(20)-C(21)-C(22)-C(27) | -159.0(2)   | C(27)-C(22)-C(23)-C(24) | 0.4(4)      |
| C(21)-C(22)-C(23)-C(24) | 177.8(3)    | C(22)-C(23)-C(24)-C(25) | 0.0(4)      |
| C(23)-C(24)-C(25)-C(26) | -0.5(4)     | C(24)-C(25)-C(26)-C(27) | 0.7(4)      |
| C(25)-C(26)-C(27)-C(22) | -0.3(4)     | C(23)-C(22)-C(27)-C(26) | -0.2(4)     |
| C(21)-C(22)-C(27)-C(26) | -177.8(3)   | O(16)-C(15)-C(14)-C(13) | 177.7(2)    |
| C(17)-C(15)-C(14)-C(13) | -1.2(3)     | C(19)-C(13)-C(14)-C(15) | 2.6(3)      |
| C(5)-C(13)-C(14)-C(15)  | -176.94(18) |                         |             |

**Table S7.** Hydrogen bonds for DC-01-0155 [ $\text{\AA}$  and  $^\circ$ ].

| D-H...A                 | d(D-H)  | d(H...A) | d(D...A)   | $\angle(\text{DHA})$ |
|-------------------------|---------|----------|------------|----------------------|
| N(2)-H(2)...Cl(28)#1    | 0.88(3) | 2.36(3)  | 3.1700(18) | 153(2)               |
| C(4)-H(4B)...Cl(28)#2   | 0.97    | 2.94     | 3.877(2)   | 163.6                |
| C(8)-H(8A)...Cl(28)#3   | 0.97    | 2.77     | 3.645(2)   | 150.3                |
| O(16)-H(16)...Cl(28)    | 0.89(4) | 2.16(4)  | 3.0289(19) | 165(4)               |
| C(20)-H(20B)...Cl(28)#3 | 0.97    | 2.86     | 3.823(2)   | 169.7                |

Symmetry transformations used to generate equivalent atoms:

#1  $x+1, y, z$  #2  $-x, y+1/2, -z$  #3  $x+1, y+1, z$
